# Supplementary material for: A first example of polyoxotungstate-based giant molecule. Synthesis and molecular structure of a tetrapod-shaped Ti–O–Ti bridged anhydride form of Dawson tri-titanium(iv)-substituted polyoxotungstate
Source: Royal Society of Chemistry journal article supplement (doi:10.1039/b304033j), 2003-01-01
Supplement: b304033j.pdf [file b304033j.pdf]

**A first example of polyoxotungstate-based giant molecule.  
Synthesis and molecular structure of a tetrapod-shaped  
Ti-O-Ti bridged anhydride form of Dawson  
tri-titanium(IV)-substituted polyoxotungstate**

---

Yoshitaka Sakai<sup>a</sup>, Kenji Yoza<sup>b</sup>, Chika Nozaki Kato<sup>a</sup> and Kenji Nomiya<sup>\*a</sup>

<sup>a</sup> Department of Materials Science, Faculty of Science, Kanagawa University, Hiratsuka, Kanagawa 259-1293, Japan E-Mail: [nomiya@chem.kanagawa-u.ac.jp](mailto:nomiya@chem.kanagawa-u.ac.jp)

<sup>b</sup> Nihon Bruker AXS, Kanagawa-ku, Moriyacho 3-9 A6F, Yokohama, Kanagawa 221-0022, Japan

Received xx xxxx 2003, Accepted xx xxxx 2003  
Published on the Web xx xxxx 2003

**Contents:**

- (1) **Fig. 1S** FTIR spectra in the polyoxoanion region (1200–400 cm<sup>-1</sup>), measured as KBr disks, of (a) Na<sub>x</sub>H<sub>33-x</sub>K<sub>4</sub>[(P<sub>2</sub>W<sub>15</sub>Ti<sub>3</sub>O<sub>60.5</sub>)<sub>4</sub>Cl]·yH<sub>2</sub>O (x = 21-26, y = 60-70) **1**, (b) K<sub>28</sub>H<sub>8</sub>[P<sub>2</sub>W<sub>15</sub>Ti<sub>3</sub>O<sub>60.5</sub>]<sub>4</sub>·0.8KCl·56H<sub>2</sub>O **2** and (c) K<sub>28</sub>H<sub>8</sub>[P<sub>2</sub>W<sub>15</sub>Ti<sub>3</sub>O<sub>60.5</sub>]<sub>4</sub>·46H<sub>2</sub>O **3**.
- (2) **Fig. 2S** <sup>183</sup>W NMR spectra in D<sub>2</sub>O of (a) Na<sub>x</sub>H<sub>33-x</sub>K<sub>4</sub>[(P<sub>2</sub>W<sub>15</sub>Ti<sub>3</sub>O<sub>60.5</sub>)<sub>4</sub>Cl]·yH<sub>2</sub>O (x = 21-26, y = 60-70) **1**, (b) K<sub>28</sub>H<sub>8</sub>[P<sub>2</sub>W<sub>15</sub>Ti<sub>3</sub>O<sub>60.5</sub>]<sub>4</sub>·0.8KCl·56H<sub>2</sub>O **2** and (c) K<sub>28</sub>H<sub>8</sub>[P<sub>2</sub>W<sub>15</sub>Ti<sub>3</sub>O<sub>60.5</sub>]<sub>4</sub>·46H<sub>2</sub>O **3**. The resonance at 0.0 ppm is due to the external

reference: saturated Na<sub>2</sub>WO<sub>4</sub>-D<sub>2</sub>O solution.

- (3) **Fig. 3S** <sup>31</sup>P NMR spectra in D<sub>2</sub>O of (a) Na<sub>x</sub>H<sub>33-x</sub>K<sub>4</sub>[(P<sub>2</sub>W<sub>15</sub>Ti<sub>3</sub>O<sub>60.5</sub>)<sub>4</sub>Cl]·yH<sub>2</sub>O (x = 21-26, y = 60-70) **1**, (b) K<sub>28</sub>H<sub>8</sub>[P<sub>2</sub>W<sub>15</sub>Ti<sub>3</sub>O<sub>60.5</sub>]<sub>4</sub>·0.8KCl·56H<sub>2</sub>O **2** and (c) K<sub>28</sub>H<sub>8</sub>[P<sub>2</sub>W<sub>15</sub>Ti<sub>3</sub>O<sub>60.5</sub>]<sub>4</sub>·46H<sub>2</sub>O **3**. The resonance at 0.0 ppm is due to the external reference: 25% H<sub>3</sub>PO<sub>4</sub> in H<sub>2</sub>O. In each case a very high level of purity is indicated (*i.e.*, with respect to any other P-containing polyoxoanions or other materials).
- (4) **Table S1** Bond distances and angles of compound **1**, which are not listed in Table 1.

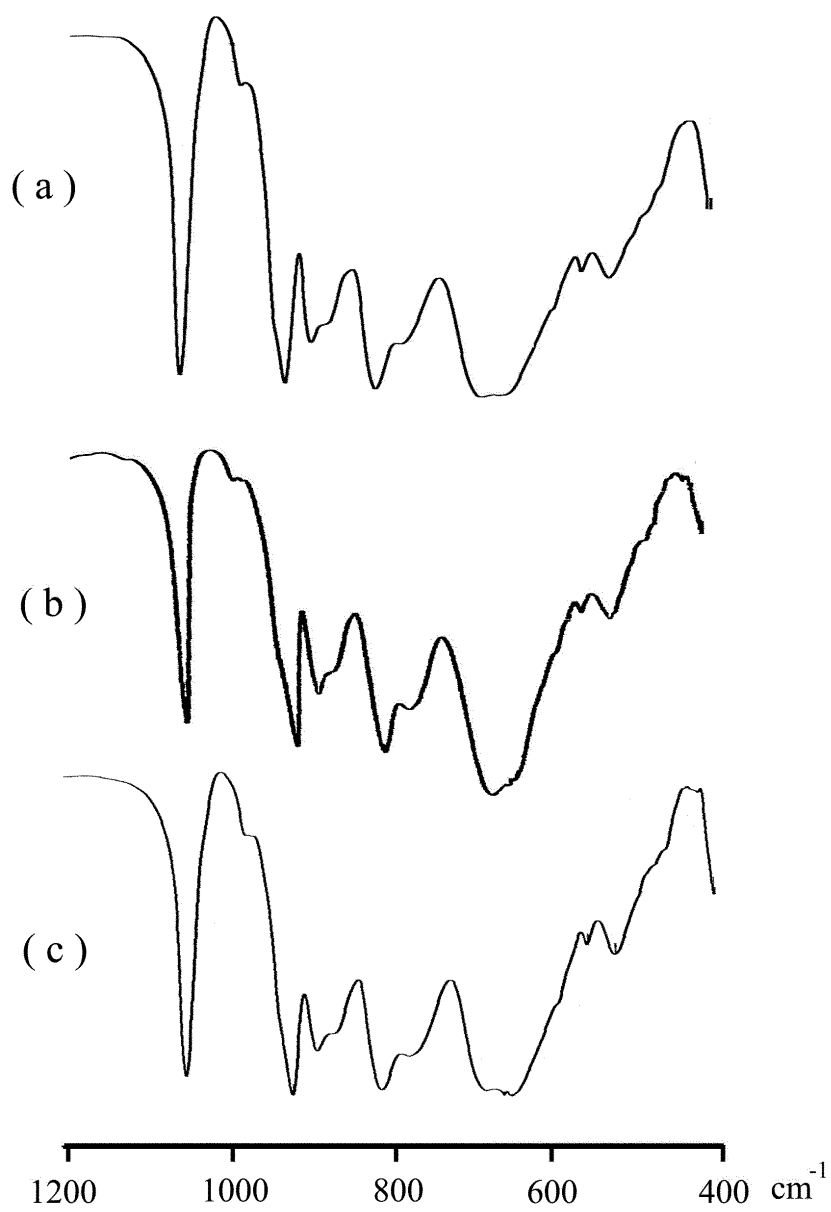

Fig.1S

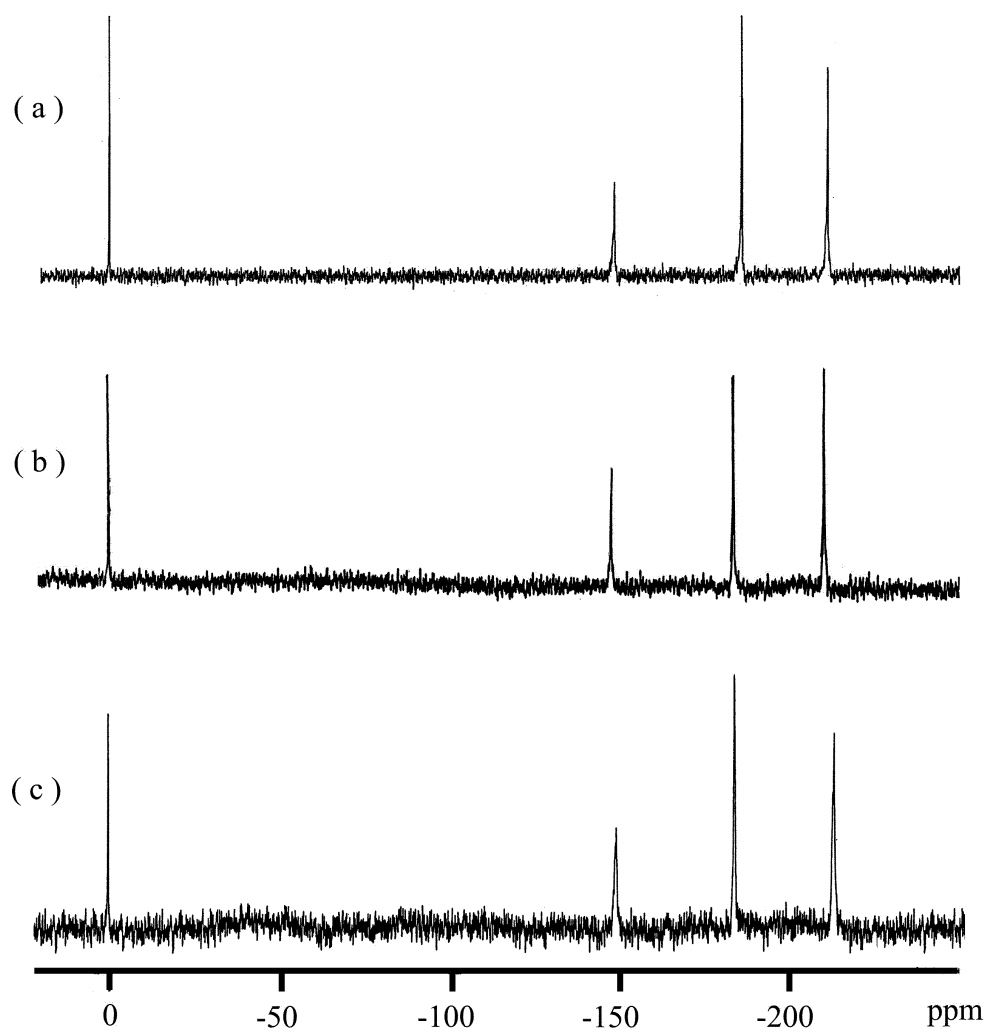

Fig. 2S

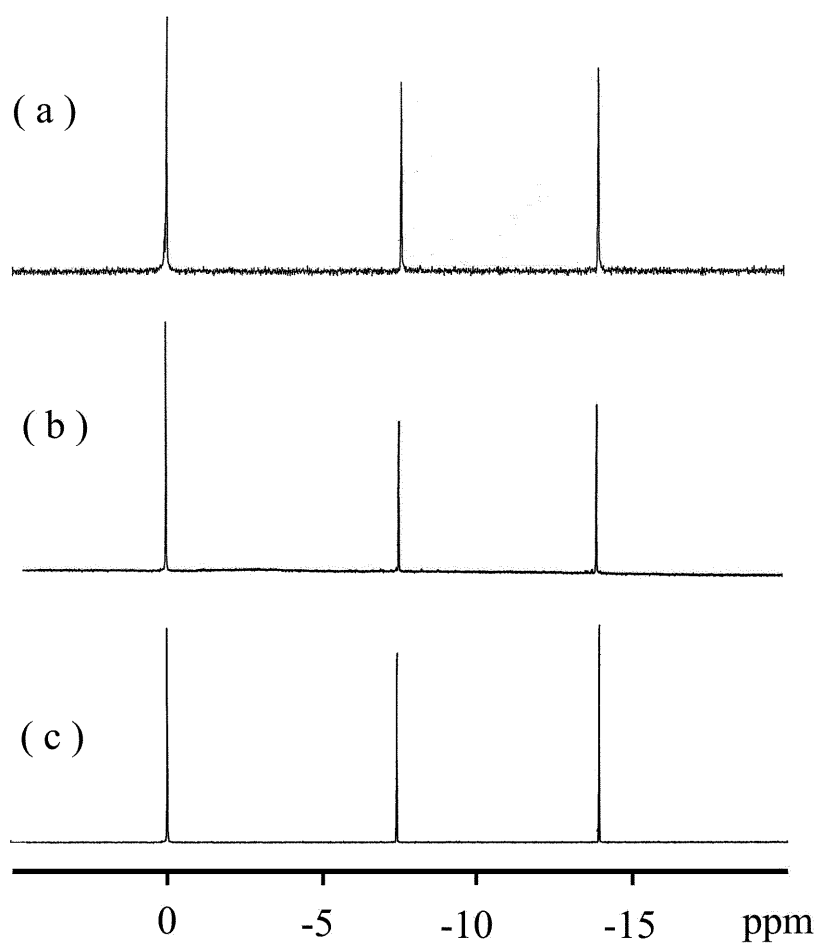

Fig. 3S

**Table S1** Bond distances (Å) and angles (°) for compound **1** (73 pages long)

---

|         |           |         |
|---------|-----------|---------|
| K1 O21  | 2.79(5)   | . ?     |
| K1 Na74 | 2.84(3)   | . ?     |
| K1 Na32 | 2.86(3)   | . ?     |
| K1 O19C | 2.901(17) | 2_566 ? |
| K1 O29A | 2.904(18) | . ?     |
| K1 O37C | 2.90(2)   | 2_566 ? |
| K1 O20  | 2.93(5)   | . ?     |
| K1 O36A | 3.046(18) | . ?     |
| K1 W9A  | 3.822(9)  | . ?     |
| K1 W10C | 4.052(9)  | 2_566 ? |
| K1 W4C  | 4.106(9)  | 2_566 ? |
| K2 O11  | 2.84(5)   | . ?     |
| K2 Na73 | 2.84(3)   | . ?     |
| K2 O39C | 2.87(2)   | . ?     |
| K2 O13  | 2.90(3)   | . ?     |
| K2 O33B | 2.909(18) | 2_577 ? |
| K2 Na42 | 2.92(3)   | . ?     |
| K2 O21C | 2.964(18) | . ?     |
| K2 O34B | 3.26(2)   | 2_577 ? |
| K2 W7B  | 3.943(9)  | 2_577 ? |
| K2 Na2  | 4.01(3)   | . ?     |
| K2 W12C | 4.062(9)  | . ?     |
| K2 Na55 | 4.22(3)   | 2_577 ? |
| K3 Na71 | 2.81(3)   | . ?     |
| K3 O17C | 2.857(18) | . ?     |
| K3 O3   | 2.87(5)   | . ?     |
| K3 Na51 | 2.89(3)   | . ?     |
| K3 O31D | 2.900(17) | 2_567 ? |
| K3 O2   | 2.98(6)   | . ?     |
| K3 O35C | 2.986(19) | . ?     |
| K3 O38D | 3.07(2)   | 2_567 ? |
| K3 Na43 | 3.76(3)   | 2_567 ? |
| K3 W11D | 3.847(9)  | 2_567 ? |
| K3 W2C  | 4.130(8)  | . ?     |
| K3 Na46 | 4.29(3)   | . ?     |
| K4 Na72 | 2.82(3)   | . ?     |
| K4 O29B | 2.858(19) | 2_677 ? |
| K4 O37A | 2.934(18) | . ?     |
| K4 Na31 | 2.95(3)   | . ?     |
| K4 O19A | 2.975(18) | . ?     |
| K4 O36B | 3.179(19) | 2_677 ? |
| K4 Na53 | 3.19(3)   | . ?     |
| K4 O212 | 3.42(5)   | . ?     |
| K4 W9B  | 3.864(9)  | 2_677 ? |

K4 Na23 3.88(3) . ?  
K4 W10A 4.137(9) . ?  
K4 Na34 4.30(3) 2\_677 ?  
Na1 O18 2.84(6) . ?  
Na1 O46A 2.88(3) . ?  
Na1 O170 2.97(4) 1\_565 ?  
Na1 O43B 2.99(3) 1\_554 ?  
Na1 O49B 2.99(3) 1\_554 ?  
Na2 Na41 2.24(4) . ?  
Na2 O10 2.27(6) . ?  
Na2 O11 2.27(6) . ?  
Na2 O8 2.45(6) . ?  
Na2 O16A 2.47(3) . ?  
Na2 O21C 2.48(3) . ?  
Na2 Na73 4.09(4) . ?  
Na3 O3D 2.63(3) . ?  
Na3 Na56 2.66(4) . ?  
Na3 O2A 2.67(3) . ?  
Na3 O1B 2.68(3) . ?  
Na3 Na45 3.42(4) . ?  
Na4 O43 2.32(6) . ?  
Na4 O42 2.36(6) . ?  
Na4 O18B 2.42(3) . ?  
Na4 O15 2.50(6) . ?  
Na4 Na34 2.56(4) . ?  
Na4 O44 2.63(4) . ?  
Na4 Na80 4.03(4) 2\_677 ?  
Na5 O19B 2.79(3) . ?  
Na5 O20D 2.86(3) . ?  
Na5 O8D 2.96(3) . ?  
Na5 O7B 2.98(3) . ?  
Na5 O66 3.01(6) . ?  
Na5 W5D 3.67(3) . ?  
Na5 W4B 3.68(3) . ?  
Na5 Na37 3.70(4) . ?  
Na5 Na44 4.00(4) . ?  
Na6 O50 2.72(4) . ?  
Na6 O210 2.72(6) . ?  
Na6 Na43 2.75(4) 2\_567 ?  
Na6 O11C 2.87(3) . ?  
Na6 Na54 3.35(4) 2\_567 ?  
Na6 Na46 3.36(4) . ?  
Na6 Na71 3.37(4) . ?  
Na9 O54 2.24(6) . ?  
Na9 O15A 2.84(3) . ?  
Na9 O53 2.94(6) . ?  
Na9 Na14 3.51(4) . ?

Na9 Na41 3.52(4) . ?  
Na10 O30 2.42(4) . ?  
Na10 O63 2.93(6) . ?  
Na10 O33 3.00(4) . ?  
Na11 O215 2.58(6) . ?  
Na11 O37 2.75(6) . ?  
Na11 O53 2.85(6) . ?  
Na11 O15B 2.86(3) . ?  
Na11 Na73 3.38(4) 2\_577 ?  
Na11 Na55 3.75(4) . ?  
Na12 O39 2.57(6) . ?  
Na12 O145 2.85(6) . ?  
Na14 O23 2.96(6) . ?  
Na15 O56 2.37(6) . ?  
Na15 Na52 2.37(4) . ?  
Na15 O48 2.39(6) . ?  
Na15 O34C 2.72(3) 2\_577 ?  
Na15 O285 2.97(6) . ?  
Na15 Na35 3.41(3) 2\_577 ?  
Na15 Na55 3.61(4) . ?  
Na16 Na33 2.35(4) . ?  
Na16 O51 2.44(6) . ?  
Na16 O44 2.79(4) 2\_677 ?  
Na16 O49 2.88(6) . ?  
Na16 O52 2.90(6) . ?  
Na16 Na80 3.22(4) . ?  
Na16 Na56 3.38(4) 2\_677 ?  
Na16 Na56 3.57(4) . ?  
Na17 O29 2.86(6) . ?  
Na17 O222 2.96(4) . ?  
Na17 O47D 2.98(3) . ?  
Na21 O12B 2.90(3) . ?  
Na22 O50B 2.90(3) 1\_544 ?  
Na22 O47 2.96(6) . ?  
Na22 O55 2.96(4) . ?  
Na22 O29D 2.97(3) . ?  
Na23 Na45 2.45(4) . ?  
Na23 Na72 2.51(4) . ?  
Na23 O19A 2.57(3) . ?  
Na23 O46 2.64(6) . ?  
Na23 O68 2.79(4) . ?  
Na23 Na33 3.18(4) 2\_677 ?  
Na23 Na56 3.81(4) . ?  
Na23 Na80 4.12(3) 2\_677 ?  
Na24 O166 2.25(6) . ?  
Na24 O109 2.48(6) . ?  
Na24 O227 2.75(6) . ?



Na24 O61 2.92(4) . ?  
Na25 Na44 2.29(4) . ?  
Na26 O213 2.34(6) . ?  
Na26 O211 2.35(6) . ?  
Na26 O2C 2.42(3) . ?  
Na26 O1A 2.43(3) . ?  
Na26 O1D 2.44(3) . ?  
Na26 O181 2.50(6) . ?  
Na26 Ti3C 3.74(3) . ?  
Na26 Ti2C 3.76(3) . ?  
Na26 Ti2A 3.77(3) . ?  
Na26 Ti1A 3.78(3) . ?  
Na26 Ti1D 3.80(3) . ?  
Na26 Ti2D 3.80(2) . ?  
Na31 O93 2.42(4) 2\_666 ?  
Na31 O289 2.81(4) . ?  
Na31 O12A 2.95(3) . ?  
Na31 O99 2.99(6) 2\_666 ?  
Na32 O185 2.73(6) . ?  
Na32 O84 2.82(4) . ?  
Na33 Na80 2.29(4) . ?  
Na33 O52 2.45(6) . ?  
Na33 O91 2.49(6) . ?  
Na33 O17B 2.50(3) . ?  
Na33 Na23 3.18(4) 2\_677 ?  
Na33 Na56 3.84(4) 2\_677 ?  
Na34 Na72 2.85(4) 2\_677 ?  
Na34 K4 4.30(3) 2\_677 ?  
Na35 Na52 2.23(4) 2\_577 ?  
Na35 Na55 2.82(4) 2\_577 ?  
Na35 O34B 2.85(3) 2\_577 ?  
Na35 O33C 2.86(3) . ?  
Na35 Na76 3.04(4) . ?  
Na35 Na15 3.41(3) 2\_577 ?  
Na36 O29 2.29(6) . ?  
Na36 O94 2.31(6) . ?  
Na36 O287 2.31(6) . ?  
Na36 O48B 2.42(3) 1\_544 ?  
Na36 O170 2.42(4) . ?  
Na36 O27 2.58(6) . ?  
Na37 O210 2.64(6) . ?  
Na37 O2D 2.68(3) . ?  
Na37 O2B 2.70(3) . ?  
Na37 O1C 2.72(3) . ?  
Na37 Na54 3.32(4) 2\_567 ?  
Na38 O115 2.70(4) . ?  
Na38 Na47 2.76(4) 2\_666 ?

Na38 O289 2.78(4) . ?  
Na38 O31C 2.97(3) 2\_566 ?  
Na38 Na53 3.90(4) . ?  
Na41 O54 2.57(6) . ?  
Na41 O4A 2.94(3) . ?  
Na41 O9C 2.96(3) . ?  
Na41 Na75 3.20(4) . ?  
Na42 O119 2.80(6) . ?  
Na43 Na54 2.40(4) . ?  
Na43 O17C 2.49(3) 2\_567 ?  
Na43 Na71 2.49(4) 2\_567 ?  
Na43 O2 2.66(6) 2\_567 ?  
Na43 Na6 2.75(4) 2\_567 ?  
Na43 O30 2.86(4) . ?  
Na43 K3 3.76(3) 2\_567 ?  
Na44 O290 2.32(4) . ?  
Na44 O77 2.44(4) . ?  
Na44 O45 2.45(6) . ?  
Na44 O20D 2.65(3) . ?  
Na44 Na46 4.06(4) 2\_567 ?  
Na45 O4D 2.90(3) . ?  
Na45 O7A 2.92(3) . ?  
Na45 O19A 3.00(3) . ?  
Na45 Na56 3.12(4) . ?  
Na45 W1D 3.73(3) . ?  
Na45 W4A 3.73(2) . ?  
Na45 Na80 3.99(4) 2\_677 ?  
Na46 O77 2.80(4) 2\_567 ?  
Na46 Na71 2.81(4) . ?  
Na46 Na44 4.06(4) 2\_567 ?  
Na47 Na38 2.76(4) 2\_666 ?  
Na47 Na53 2.78(4) 2\_666 ?  
Na47 O94 2.79(6) . ?  
Na47 O25 2.83(6) . ?  
Na51 O106 2.76(6) 2\_567 ?  
Na51 O10C 2.99(3) . ?  
Na52 Na35 2.23(4) 2\_577 ?  
Na52 O285 2.25(6) . ?  
Na52 O160 2.37(6) . ?  
Na52 Na76 2.40(4) 2\_577 ?  
Na52 O16B 2.63(3) . ?  
Na52 Na55 3.99(4) . ?  
Na53 O212 2.63(6) . ?  
Na53 O114 2.73(6) . ?  
Na53 Na47 2.78(4) 2\_666 ?  
Na53 O42B 2.99(3) 2\_677 ?  
Na54 O5C 2.96(3) 2\_567 ?

Na54 O8B 3.00(3) 2\_567 ?  
Na54 Na37 3.32(4) 2\_567 ?  
Na54 Na6 3.35(4) 2\_567 ?  
Na55 O56 2.63(6) . ?  
Na55 O215 2.72(6) . ?  
Na55 Na73 2.75(4) 2\_577 ?  
Na55 Na35 2.82(4) 2\_577 ?  
Na55 K2 4.22(3) 2\_577 ?  
Na56 O44 1.95(4) . ?  
Na56 O46 2.62(6) . ?  
Na56 O49 2.96(6) . ?  
Na56 Na80 3.00(4) 2\_677 ?  
Na56 Na16 3.38(4) 2\_677 ?  
Na56 Na33 3.84(4) 2\_677 ?  
Na71 Na43 2.49(4) 2\_567 ?  
Na72 Na34 2.85(4) 2\_677 ?  
Na73 O10 2.72(6) . ?  
Na73 Na55 2.75(4) 2\_577 ?  
Na73 Na11 3.38(4) 2\_577 ?  
Na74 O288 2.74(6) . ?  
Na75 O53 2.61(6) . ?  
Na75 O3C 2.68(3) . ?  
Na75 O3A 2.68(3) . ?  
Na75 O3B 2.69(3) . ?  
Na76 Na52 2.40(4) 2\_577 ?  
Na76 O91 2.87(6) 2\_577 ?  
Na80 O44 2.38(4) 2\_677 ?  
Na80 O43 2.61(6) 2\_677 ?  
Na80 O15D 2.79(3) 2\_677 ?  
Na80 Na56 3.00(4) 2\_677 ?  
Na80 Na45 3.99(4) 2\_677 ?  
Na80 Na4 4.03(4) 2\_677 ?  
Na80 Na23 4.12(3) 2\_677 ?  
O2 Na43 2.66(6) 2\_567 ?  
O43 Na80 2.61(6) 2\_677 ?  
O44 Na80 2.38(4) 2\_677 ?  
O44 Na16 2.79(4) 2\_677 ?  
O51 O282 1.51(7) . ?  
O77 Na46 2.80(4) 2\_567 ?  
O91 Na76 2.87(6) 2\_577 ?  
O93 Na31 2.42(4) 2\_666 ?  
O99 Na31 2.99(6) 2\_666 ?  
O104 O181 0.92(6) . ?  
O106 Na51 2.76(6) 2\_567 ?  
O170 Na1 2.97(4) 1\_545 ?  
O209 O227 1.69(6) 2\_566 ?  
O227 O209 1.69(6) 2\_566 ?

O1A Ti1A 1.888(15) . ?  
O1A Ti2A 1.935(16) . ?  
O2A Ti3A 1.951(15) . ?  
O2A Ti2A 1.955(14) . ?  
O3A Ti3A 1.923(16) . ?  
O3A Ti1A 1.954(15) . ?  
O4A W1A 1.833(15) . ?  
O4A Ti1A 1.975(16) . ?  
O5A W2A 1.856(14) . ?  
O5A Ti1A 1.937(15) . ?  
O6A W3A 1.825(15) . ?  
O6A Ti2A 1.939(15) . ?  
O7A W4A 1.833(14) . ?  
O7A Ti2A 1.969(15) . ?  
O8A W5A 1.818(15) . ?  
O8A Ti3A 1.982(16) . ?  
O9A W6A 1.831(14) . ?  
O9A Ti3A 1.953(15) . ?  
O10A W1A 1.902(15) . ?  
O10A W2A 1.922(16) . ?  
O11A W2A 1.907(14) . ?  
O11A W3A 1.945(15) . ?  
O12A W4A 1.910(14) . ?  
O12A W3A 1.914(14) . ?  
O13A W5A 1.935(15) . ?  
O13A W4A 1.943(15) . ?  
O14A W6A 1.898(15) . ?  
O14A W5A 1.912(15) . ?  
O15A W1A 1.917(16) . ?  
O15A W6A 1.945(17) . ?  
O16A W1A 1.711(17) . ?  
O17A W2A 1.688(16) . ?  
O18A W3A 1.719(16) . ?  
O19A W4A 1.737(16) . ?  
O20A W5A 1.706(16) . ?  
O21A W6A 1.709(16) . ?  
O22A W7A 1.858(15) . ?  
O22A W1A 1.968(15) . ?  
O23A W8A 1.870(15) . ?  
O23A W2A 1.946(15) . ?  
O24A W9A 1.842(15) . ?  
O24A W3A 1.976(15) . ?  
O25A W10A 1.839(15) . ?  
O25A W4A 1.982(15) . ?  
O26A W11A 1.853(15) . ?  
O26A W5A 1.974(15) . ?  
O27A W12A 1.846(15) . ?

O27A W6A 1.973(15) . ?  
O28A W8A 1.862(17) . ?  
O28A W7A 1.931(17) . ?  
O29A W9A 1.891(16) . ?  
O29A W8A 1.916(16) . ?  
O30A W10A 1.885(16) . ?  
O30A W9A 1.906(15) . ?  
O31A W11A 1.909(16) . ?  
O31A W10A 1.927(16) . ?  
O32A W12A 1.895(17) . ?  
O32A W11A 1.898(17) . ?  
O33A W12A 1.911(16) . ?  
O33A W7A 1.919(16) . ?  
O34A W7A 1.749(18) . ?  
O35A W8A 1.704(18) . ?  
O36A W9A 1.711(15) . ?  
O37A W10A 1.749(17) . ?  
O38A W11A 1.701(17) . ?  
O39A W12A 1.707(19) . ?  
O40A W13A 1.895(16) . ?  
O40A W7A 1.958(16) . ?  
O41A W13A 1.902(17) . ?  
O41A W8A 1.941(17) . ?  
O42A W14A 1.882(16) . ?  
O42A W9A 1.961(16) . ?  
O43A W14A 1.894(15) . ?  
O43A W10A 1.951(15) . ?  
O44A W15A 1.871(17) . ?  
O44A W11A 1.968(17) . ?  
O45A W15A 1.902(17) . ?  
O45A W12A 1.960(17) . ?  
O46A W13A 1.716(19) . ?  
O47A W14A 1.908(18) . ?  
O47A W13A 1.960(18) . ?  
O48A W14A 1.72(2) . ?  
O49A W14A 1.921(18) . ?  
O49A W15A 1.966(18) . ?  
O50A W15A 1.72(2) . ?  
O51A W15A 1.941(18) . ?  
O51A W13A 1.945(18) . ?  
O52A P1A 1.592(14) . ?  
O52A Ti1A 2.242(15) . ?  
O52A Ti2A 2.252(14) . ?  
O52A Ti3A 2.307(14) . ?  
O53A P1A 1.533(15) . ?  
O53A W6A 2.345(14) . ?  
O53A W1A 2.363(15) . ?

O54A P1A 1.537(14) . ?  
O54A W3A 2.353(14) . ?  
O54A W2A 2.362(14) . ?  
O55A P1A 1.543(16) . ?  
O55A W4A 2.338(14) . ?  
O55A W5A 2.350(14) . ?  
O56A P2A 1.545(17) . ?  
O56A W7A 2.330(16) . ?  
O56A W12A 2.377(15) . ?  
O57A P2A 1.535(17) . ?  
O57A W9A 2.340(15) . ?  
O57A W8A 2.356(16) . ?  
O58A P2A 1.520(16) . ?  
O58A W10A 2.335(15) . ?  
O58A W11A 2.406(15) . ?  
O59A P2A 1.598(15) . ?  
O59A W15A 2.365(15) . ?  
O59A W13A 2.366(15) . ?  
O59A W14A 2.366(15) . ?  
O1B Ti1B 1.918(15) . ?  
O1B Ti2B 1.927(14) . ?  
O2B Ti2B 1.949(15) . ?  
O2B Ti3B 1.970(15) . ?  
O3B Ti1B 1.913(15) . ?  
O3B Ti3B 1.953(14) . ?  
O4B W1B 1.827(14) . ?  
O4B Ti1B 1.967(14) . ?  
O5B W2B 1.825(14) . ?  
O5B Ti1B 1.967(15) . ?  
O6B W3B 1.846(14) . ?  
O6B Ti2B 1.937(15) . ?  
O7B W4B 1.858(14) . ?  
O7B Ti2B 1.934(14) . ?  
O8B W5B 1.867(14) . ?  
O8B Ti3B 1.927(14) . ?  
O8B Na54 3.00(3) 2\_567 ?  
O9B W6B 1.827(13) . ?  
O9B Ti3B 1.956(14) . ?  
O10B W1B 1.881(16) . ?  
O10B W2B 1.929(15) . ?  
O11B W3B 1.928(14) . ?  
O11B W2B 1.935(14) . ?  
O12B W3B 1.882(14) . ?  
O12B W4B 1.945(14) . ?  
O13B W4B 1.913(15) . ?  
O13B W5B 1.921(14) . ?  
O14B W5B 1.908(14) . ?

O14B W6B 1.910(14) . ?  
O15B W6B 1.921(15) . ?  
O15B W1B 1.929(16) . ?  
O16B W1B 1.724(16) . ?  
O17B W2B 1.691(15) . ?  
O18B W3B 1.728(16) . ?  
O19B W4B 1.733(17) . ?  
O20B W5B 1.716(17) . ?  
O21B W6B 1.712(17) . ?  
O22B W7B 1.860(15) . ?  
O22B W1B 1.968(15) . ?  
O23B W8B 1.847(15) . ?  
O23B W2B 1.978(15) . ?  
O24B W9B 1.865(13) . ?  
O24B W3B 1.954(14) . ?  
O25B W10B 1.844(14) . ?  
O25B W4B 1.974(14) . ?  
O26B W11B 1.860(15) . ?  
O26B W5B 1.947(14) . ?  
O27B W12B 1.835(15) . ?  
O27B W6B 1.984(16) . ?  
O28B W8B 1.887(15) . ?  
O28B W7B 1.902(15) . ?  
O29B W9B 1.914(16) . ?  
O29B W8B 1.923(16) . ?  
O29B K4 2.858(19) 2\_677 ?  
O30B W10B 1.888(16) . ?  
O30B W9B 1.907(16) . ?  
O31B W10B 1.907(16) . ?  
O31B W11B 1.923(16) . ?  
O32B W11B 1.897(16) . ?  
O32B W12B 1.903(16) . ?  
O33B W12B 1.905(16) . ?  
O33B W7B 1.923(16) . ?  
O33B K2 2.909(18) 2\_577 ?  
O34B W7B 1.737(17) . ?  
O34B Na35 2.85(3) 2\_577 ?  
O34B K2 3.26(2) 2\_577 ?  
O35B W8B 1.714(18) . ?  
O36B W9B 1.717(17) . ?  
O36B K4 3.179(19) 2\_677 ?  
O37B W10B 1.735(17) . ?  
O38B W11B 1.688(17) . ?  
O39B W12B 1.723(19) . ?  
O40B W13B 1.918(15) . ?  
O40B W7B 1.934(15) . ?  
O41B W13B 1.884(16) . ?

O41B W8B 1.957(16) . ?  
O42B W14B 1.888(16) . ?  
O42B W9B 1.953(16) . ?  
O42B Na53 2.99(3) 2\_677 ?  
O43B W14B 1.883(15) . ?  
O43B W10B 1.961(15) . ?  
O43B Na1 2.99(3) 1\_556 ?  
O44B W11B 1.921(16) . ?  
O44B W15B 1.935(16) . ?  
O45B W15B 1.882(15) . ?  
O45B W12B 1.977(15) . ?  
O46B W13B 1.733(18) . ?  
O47B W13B 1.917(16) . ?  
O47B W14B 1.974(17) . ?  
O48B W14B 1.724(18) . ?  
O48B Na36 2.42(3) 1\_566 ?  
O49B W14B 1.922(17) . ?  
O49B W15B 1.939(17) . ?  
O49B Na1 2.99(3) 1\_556 ?  
O50B W15B 1.718(18) . ?  
O50B Na22 2.90(3) 1\_566 ?  
O51B W15B 1.926(17) . ?  
O51B W13B 1.936(17) . ?  
O52B P1B 1.577(14) . ?  
O52B Ti3B 2.259(15) . ?  
O52B Ti1B 2.281(14) . ?  
O52B Ti2B 2.303(14) . ?  
O53B P1B 1.519(15) . ?  
O53B W1B 2.364(14) . ?  
O53B W6B 2.373(15) . ?  
O54B P1B 1.515(15) . ?  
O54B W3B 2.349(14) . ?  
O54B W2B 2.370(14) . ?  
O55B P1B 1.530(14) . ?  
O55B W4B 2.352(14) . ?  
O55B W5B 2.379(14) . ?  
O56B P2B 1.526(16) . ?  
O56B W7B 2.364(15) . ?  
O56B W12B 2.383(15) . ?  
O57B P2B 1.526(16) . ?  
O57B W8B 2.357(15) . ?  
O57B W9B 2.372(15) . ?  
O58B P2B 1.503(16) . ?  
O58B W11B 2.371(15) . ?  
O58B W10B 2.378(14) . ?  
O59B P2B 1.601(15) . ?  
O59B W13B 2.348(15) . ?



O59B W14B 2.367(15) . ?  
O59B W15B 2.382(15) . ?  
O1C Ti1C 1.925(15) . ?  
O1C Ti2C 1.926(15) . ?  
O2C Ti3C 1.893(15) . ?  
O2C Ti2C 1.897(15) . ?  
O3C Ti1C 1.923(15) . ?  
O3C Ti3C 1.965(15) . ?  
O4C W1C 1.840(15) . ?  
O4C Ti1C 1.959(15) . ?  
O5C W2C 1.847(15) . ?  
O5C Ti1C 1.934(15) . ?  
O5C Na54 2.96(3) 2\_567 ?  
O6C W3C 1.812(15) . ?  
O6C Ti2C 1.983(15) . ?  
O7C W4C 1.828(15) . ?  
O7C Ti2C 1.957(15) . ?  
O8C W5C 1.864(15) . ?  
O8C Ti3C 1.910(15) . ?  
O9C W6C 1.830(15) . ?  
O9C Ti3C 1.987(15) . ?  
O10C W2C 1.897(15) . ?  
O10C W1C 1.923(15) . ?  
O11C W2C 1.908(15) . ?  
O11C W3C 1.941(14) . ?  
O12C W3C 1.909(15) . ?  
O12C W4C 1.917(15) . ?  
O13C W4C 1.921(14) . ?  
O13C W5C 1.934(14) . ?  
O14C W6C 1.889(15) . ?  
O14C W5C 1.933(15) . ?  
O15C W1C 1.930(14) . ?  
O15C W6C 1.935(14) . ?  
O16C W1C 1.701(15) . ?  
O17C W2C 1.725(15) . ?  
O17C Na43 2.49(3) 2\_567 ?  
O18C W3C 1.740(15) . ?  
O19C W4C 1.696(14) . ?  
O19C K1 2.901(17) 2\_566 ?  
O20C W5C 1.727(15) . ?  
O21C W6C 1.712(16) . ?  
O22C W7C 1.860(16) . ?  
O22C W1C 1.973(16) . ?  
O23C W8C 1.862(15) . ?  
O23C W2C 1.966(15) . ?  
O24C W9C 1.852(16) . ?  
O24C W3C 1.971(16) . ?

O25C W10C 1.840(15) . ?  
O25C W4C 1.980(15) . ?  
O26C W11C 1.846(15) . ?  
O26C W5C 1.968(15) . ?  
O27C W12C 1.849(17) . ?  
O27C W6C 1.980(17) . ?  
O28C W8C 1.882(15) . ?  
O28C W7C 1.898(15) . ?  
O29C W8C 1.903(16) . ?  
O29C W9C 1.919(15) . ?  
O30C W10C 1.894(14) . ?  
O30C W9C 1.898(14) . ?  
O31C W11C 1.895(16) . ?  
O31C W10C 1.936(15) . ?  
O31C Na38 2.97(3) 2\_566 ?  
O32C W12C 1.881(16) . ?  
O32C W11C 1.893(16) . ?  
O33C W7C 1.914(15) . ?  
O33C W12C 1.935(16) . ?  
O34C W7C 1.707(18) . ?  
O34C Na15 2.72(3) 2\_577 ?  
O35C W8C 1.735(16) . ?  
O36C W9C 1.728(16) . ?  
O37C W10C 1.716(17) . ?  
O37C K1 2.90(2) 2\_566 ?  
O38C W11C 1.704(15) . ?  
O39C W12C 1.705(17) . ?  
O40C W13C 1.899(17) . ?  
O40C W7C 1.955(17) . ?  
O41C W13C 1.887(17) . ?  
O41C W8C 1.954(18) . ?  
O42C W14C 1.908(17) . ?  
O42C W9C 1.940(17) . ?  
O43C W14C 1.917(16) . ?  
O43C W10C 1.920(16) . ?  
O44C W15C 1.894(17) . ?  
O44C W11C 1.947(17) . ?  
O45C W15C 1.869(16) . ?  
O45C W12C 1.979(16) . ?  
O46C W13C 1.72(2) . ?  
O47C W13C 1.936(17) . ?  
O47C W14C 1.941(17) . ?  
O48C W14C 1.746(19) . ?  
O49C W15C 1.930(17) . ?  
O49C W14C 1.949(17) . ?  
O50C W15C 1.72(2) . ?  
O51C W13C 1.924(16) . ?

O51C W15C 1.933(16) . ?  
O52C P1C 1.583(15) . ?  
O52C Ti2C 2.253(14) . ?  
O52C Ti3C 2.261(14) . ?  
O52C Ti1C 2.278(14) . ?  
O53C P1C 1.542(15) . ?  
O53C W6C 2.352(13) . ?  
O53C W1C 2.356(14) . ?  
O54C P1C 1.532(14) . ?  
O54C W2C 2.349(13) . ?  
O54C W3C 2.358(14) . ?  
O55C P1C 1.548(14) . ?  
O55C W4C 2.347(14) . ?  
O55C W5C 2.372(13) . ?  
O56C P2C 1.531(16) . ?  
O56C W7C 2.344(14) . ?  
O56C W12C 2.357(14) . ?  
O57C P2C 1.513(15) . ?  
O57C W9C 2.366(14) . ?  
O57C W8C 2.380(14) . ?  
O58C P2C 1.536(15) . ?  
O58C W11C 2.358(14) . ?  
O58C W10C 2.367(14) . ?  
O59C P2C 1.592(17) . ?  
O59C W13C 2.364(15) . ?  
O59C W14C 2.367(15) . ?  
O59C W15C 2.372(15) . ?  
O1D Ti2D 1.915(14) . ?  
O1D Ti1D 1.925(15) . ?  
O2D Ti3D 1.916(15) . ?  
O2D Ti2D 1.951(15) . ?  
O3D Ti3D 1.963(14) . ?  
O3D Ti1D 1.968(15) . ?  
O4D W1D 1.844(15) . ?  
O4D Ti1D 1.963(16) . ?  
O5D W2D 1.833(15) . ?  
O5D Ti1D 1.938(15) . ?  
O6D W3D 1.834(15) . ?  
O6D Ti2D 1.943(15) . ?  
O7D W4D 1.820(15) . ?  
O7D Ti2D 1.970(15) . ?  
O8D W5D 1.861(14) . ?  
O8D Ti3D 1.915(14) . ?  
O9D W6D 1.868(15) . ?  
O9D Ti3D 1.934(16) . ?  
O10D W2D 1.900(15) . ?  
O10D W1D 1.907(14) . ?

O11D W3D 1.917(14) . ?  
O11D W2D 1.928(15) . ?  
O12D W4D 1.909(14) . ?  
O12D W3D 1.921(14) . ?  
O13D W5D 1.917(15) . ?  
O13D W4D 1.926(14) . ?  
O14D W5D 1.889(15) . ?  
O14D W6D 1.915(15) . ?  
O15D W1D 1.906(15) . ?  
O15D W6D 1.954(15) . ?  
O15D Na80 2.79(3) 2\_677 ?  
O16D W1D 1.714(16) . ?  
O17D W2D 1.733(16) . ?  
O18D W3D 1.710(17) . ?  
O19D W4D 1.715(17) . ?  
O20D W5D 1.712(16) . ?  
O21D W6D 1.705(16) . ?  
O22D W7D 1.872(16) . ?  
O22D W1D 1.942(16) . ?  
O23D W8D 1.847(15) . ?  
O23D W2D 1.961(15) . ?  
O24D W9D 1.867(16) . ?  
O24D W3D 1.943(16) . ?  
O25D W10D 1.823(16) . ?  
O25D W4D 1.988(16) . ?  
O26D W11D 1.869(15) . ?  
O26D W5D 1.952(15) . ?  
O27D W12D 1.860(15) . ?  
O27D W6D 1.959(15) . ?  
O28D W8D 1.881(16) . ?  
O28D W7D 1.908(15) . ?  
O29D W9D 1.913(17) . ?  
O29D W8D 1.916(17) . ?  
O30D W9D 1.893(15) . ?  
O30D W10D 1.922(15) . ?  
O31D W11D 1.912(16) . ?  
O31D W10D 1.926(15) . ?  
O31D K3 2.900(17) 2\_567 ?  
O32D W11D 1.882(16) . ?  
O32D W12D 1.913(16) . ?  
O33D W7D 1.919(18) . ?  
O33D W12D 1.935(18) . ?  
O34D W7D 1.722(18) . ?  
O35D W8D 1.735(16) . ?  
O36D W9D 1.741(18) . ?  
O37D W10D 1.717(17) . ?  
O38D W11D 1.726(16) . ?

O38D K3 3.069(19) 2\_567 ?  
O39D W12D 1.70(2) . ?  
O40D W7D 1.926(17) . ?  
O40D W13D 1.930(17) . ?  
O41D W13D 1.877(17) . ?  
O41D W8D 1.959(17) . ?  
O42D W14D 1.878(16) . ?  
O42D W9D 1.961(17) . ?  
O43D W14D 1.894(17) . ?  
O43D W10D 1.956(17) . ?  
O44D W15D 1.916(18) . ?  
O44D W11D 1.935(18) . ?  
O45D W15D 1.892(18) . ?  
O45D W12D 1.969(17) . ?  
O46D W13D 1.698(19) . ?  
O47D W13D 1.938(18) . ?  
O47D W14D 1.953(18) . ?  
O48D W14D 1.746(19) . ?  
O49D W14D 1.937(18) . ?  
O49D W15D 1.947(19) . ?  
O50D W15D 1.72(2) . ?  
O51D W15D 1.946(18) . ?  
O51D W13D 1.955(17) . ?  
O52D P1D 1.580(14) . ?  
O52D Ti2D 2.244(14) . ?  
O52D Ti1D 2.272(13) . ?  
O52D Ti3D 2.289(14) . ?  
O53D P1D 1.551(15) . ?  
O53D W6D 2.331(13) . ?  
O53D W1D 2.356(13) . ?  
O54D P1D 1.530(14) . ?  
O54D W2D 2.363(13) . ?  
O54D W3D 2.371(14) . ?  
O55D P1D 1.525(14) . ?  
O55D W4D 2.355(14) . ?  
O55D W5D 2.360(13) . ?  
O56D P2D 1.554(16) . ?  
O56D W12D 2.339(15) . ?  
O56D W7D 2.357(15) . ?  
O57D P2D 1.542(16) . ?  
O57D W8D 2.361(14) . ?  
O57D W9D 2.361(15) . ?  
O58D P2D 1.544(16) . ?  
O58D W11D 2.345(14) . ?  
O58D W10D 2.364(15) . ?  
O59D P2D 1.572(16) . ?  
O59D W13D 2.368(15) . ?

O59D W14D 2.376(16) . ?  
O59D W15D 2.382(15) . ?  
O1E Ti3A 1.815(15) . ?  
O1E Ti1B 1.823(15) . ?  
O2E Ti3B 1.812(15) . ?  
O2E Ti1C 1.823(15) . ?  
O3E Ti2D 1.806(16) . ?  
O3E Ti2C 1.813(15) . ?  
O4E Ti1D 1.807(15) . ?  
O4E Ti2A 1.809(15) . ?  
O5E Ti3D 1.801(15) . ?  
O5E Ti2B 1.830(15) . ?  
O6E Ti3C 1.785(15) . ?  
O6E Ti1A 1.845(15) . ?  
W7B K2 3.943(9) 2\_577 ?  
W9B K4 3.864(9) 2\_677 ?  
W4C K1 4.106(9) 2\_566 ?  
W10C K1 4.052(9) 2\_566 ?  
W11D K3 3.847(9) 2\_567 ?

O21 K1 Na74 85.9(12) . . ?  
O21 K1 Na32 84.4(12) . . ?  
Na74 K1 Na32 145.9(8) . . ?  
O21 K1 O19C 70.3(11) . 2\_566 ?  
Na74 K1 O19C 73.8(6) . 2\_566 ?  
Na32 K1 O19C 72.2(6) . 2\_566 ?  
O21 K1 O29A 85.9(11) . . ?  
Na74 K1 O29A 147.3(7) . . ?  
Na32 K1 O29A 64.2(6) . . ?  
O19C K1 O29A 131.9(5) 2\_566 . ?  
O21 K1 O37C 158.9(11) . 2\_566 ?  
Na74 K1 O37C 74.5(6) . 2\_566 ?  
Na32 K1 O37C 107.4(7) . 2\_566 ?  
O19C K1 O37C 96.2(5) 2\_566 2\_566 ?  
O29A K1 O37C 114.9(6) . 2\_566 ?  
O21 K1 O20 79.4(15) . . ?  
Na74 K1 O20 84.5(11) . . ?  
Na32 K1 O20 125.4(12) . . ?  
O19C K1 O20 143.5(11) 2\_566 . ?  
O29A K1 O20 62.9(10) . . ?  
O37C K1 O20 105.9(11) 2\_566 . ?  
O21 K1 O36A 140.4(11) . . ?  
Na74 K1 O36A 127.8(7) . . ?  
Na32 K1 O36A 76.8(6) . . ?  
O19C K1 O36A 132.9(5) 2\_566 . ?

O29A K1 O36A 54.6(5) . . ?  
O37C K1 O36A 60.7(5) 2\_566 . ?  
O20 K1 O36A 83.5(11) . . ?  
O21 K1 W9A 114.6(11) . . ?  
Na74 K1 W9A 143.8(6) . . ?  
Na32 K1 W9A 68.9(6) . . ?  
O19C K1 W9A 139.9(4) 2\_566 . ?  
O29A K1 W9A 28.7(3) . . ?  
O37C K1 W9A 86.3(4) 2\_566 . ?  
O20 K1 W9A 71.5(10) . . ?  
O36A K1 W9A 25.8(3) . . ?  
O21 K1 W10C 140.5(11) . 2\_566 ?  
Na74 K1 W10C 66.6(5) . 2\_566 ?  
Na32 K1 W10C 102.3(6) . 2\_566 ?  
O19C K1 W10C 74.9(3) 2\_566 2\_566 ?  
O29A K1 W10C 132.4(4) . 2\_566 ?  
O37C K1 W10C 21.4(4) 2\_566 2\_566 ?  
O20 K1 W10C 122.8(11) . 2\_566 ?  
O36A K1 W10C 78.3(3) . 2\_566 ?  
W9A K1 W10C 104.0(2) . 2\_566 ?  
O21 K1 W4C 88.5(11) . 2\_566 ?  
Na74 K1 W4C 66.1(5) . 2\_566 ?  
Na32 K1 W4C 81.1(6) . 2\_566 ?  
O19C K1 W4C 19.9(3) 2\_566 2\_566 ?  
O29A K1 W4C 145.2(4) . 2\_566 ?  
O37C K1 W4C 76.5(4) 2\_566 2\_566 ?  
O20 K1 W4C 148.9(10) . 2\_566 ?  
O36A K1 W4C 121.8(4) . 2\_566 ?  
W9A K1 W4C 139.0(2) . 2\_566 ?  
W10C K1 W4C 55.09(11) 2\_566 2\_566 ?  
O11 K2 Na73 86.3(12) . . ?  
O11 K2 O39C 156.1(11) . . ?  
Na73 K2 O39C 107.1(7) . . ?  
O11 K2 O13 84.9(12) . . ?  
Na73 K2 O13 127.8(8) . . ?  
O39C K2 O13 101.0(7) . . ?  
O11 K2 O33B 87.5(11) . 2\_577 ?  
Na73 K2 O33B 65.1(6) . 2\_577 ?  
O39C K2 O33B 115.9(6) . 2\_577 ?  
O13 K2 O33B 63.2(6) . 2\_577 ?  
O11 K2 Na42 83.2(12) . . ?  
Na73 K2 Na42 143.8(8) . . ?  
O39C K2 Na42 74.3(6) . . ?  
O13 K2 Na42 85.6(7) . . ?  
O33B K2 Na42 148.2(6) 2\_577 . ?  
O11 K2 O21C 70.5(11) . . ?  
Na73 K2 O21C 71.9(6) . . ?

O39C K2 O21C 94.5(5) . . ?  
O13 K2 O21C 148.2(7) . . ?  
O33B K2 O21C 132.7(5) 2\_577 . ?  
Na42 K2 O21C 72.0(6) . . ?  
O11 K2 O34B 141.0(11) . 2\_577 ?  
Na73 K2 O34B 77.8(6) . 2\_577 ?  
O39C K2 O34B 62.6(5) . 2\_577 ?  
O13 K2 O34B 77.6(6) . 2\_577 ?  
O33B K2 O34B 53.4(5) 2\_577 2\_577 ?  
Na42 K2 O34B 129.0(7) . 2\_577 ?  
O21C K2 O34B 134.2(5) . 2\_577 ?  
O11 K2 W7B 115.2(11) . 2\_577 ?  
Na73 K2 W7B 69.7(6) . 2\_577 ?  
O39C K2 W7B 88.2(4) . 2\_577 ?  
O13 K2 W7B 68.3(5) . 2\_577 ?  
O33B K2 W7B 27.7(3) 2\_577 2\_577 ?  
Na42 K2 W7B 145.3(6) . 2\_577 ?  
O21C K2 W7B 140.5(4) . 2\_577 ?  
O34B K2 W7B 25.7(3) 2\_577 2\_577 ?  
O11 K2 Na2 33.6(11) . . ?  
Na73 K2 Na2 71.1(7) . . ?  
O39C K2 Na2 131.9(6) . . ?  
O13 K2 Na2 118.0(7) . . ?  
O33B K2 Na2 106.7(5) 2\_577 . ?  
Na42 K2 Na2 81.5(7) . . ?  
O21C K2 Na2 38.0(5) . . ?  
O34B K2 Na2 148.4(6) 2\_577 . ?  
W7B K2 Na2 130.5(4) 2\_577 . ?  
O11 K2 W12C 139.0(11) . . ?  
Na73 K2 W12C 101.8(6) . . ?  
O39C K2 W12C 20.5(4) . . ?  
O13 K2 W12C 117.8(6) . . ?  
O33B K2 W12C 132.5(4) 2\_577 . ?  
Na42 K2 W12C 66.5(5) . . ?  
O21C K2 W12C 74.1(4) . . ?  
O34B K2 W12C 79.6(4) 2\_577 . ?  
W7B K2 W12C 105.1(2) 2\_577 . ?  
Na2 K2 W12C 111.4(4) . . ?  
O11 K2 Na55 117.6(11) . 2\_577 ?  
Na73 K2 Na55 40.2(6) . 2\_577 ?  
O39C K2 Na55 68.6(5) . 2\_577 ?  
O13 K2 Na55 147.1(7) . 2\_577 ?  
O33B K2 Na55 92.5(5) 2\_577 2\_577 ?  
Na42 K2 Na55 118.8(6) . 2\_577 ?  
O21C K2 Na55 64.7(5) . 2\_577 ?  
O34B K2 Na55 69.9(5) 2\_577 2\_577 ?  
W7B K2 Na55 80.0(4) 2\_577 2\_577 ?



Na2 K2 Na55 88.9(5) . 2\_577 ?  
W12C K2 Na55 61.6(4) . 2\_577 ?  
Na71 K3 O17C 68.7(6) . . ?  
Na71 K3 O3 125.9(12) . . ?  
O17C K3 O3 146.2(12) . . ?  
Na71 K3 Na51 142.9(8) . . ?  
O17C K3 Na51 74.2(6) . . ?  
O3 K3 Na51 87.2(12) . . ?  
Na71 K3 O31D 64.8(6) . 2\_567 ?  
O17C K3 O31D 129.1(5) . 2\_567 ?  
O3 K3 O31D 62.4(11) . 2\_567 ?  
Na51 K3 O31D 149.4(7) . 2\_567 ?  
Na71 K3 O2 79.3(12) . . ?  
O17C K3 O2 65.2(11) . . ?  
O3 K3 O2 86.5(15) . . ?  
Na51 K3 O2 87.7(11) . . ?  
O31D K3 O2 86.4(11) 2\_567 . ?  
Na71 K3 O35C 104.8(7) . . ?  
O17C K3 O35C 94.5(5) . . ?  
O3 K3 O35C 108.0(11) . . ?  
Na51 K3 O35C 75.3(6) . . ?  
O31D K3 O35C 116.3(5) 2\_567 . ?  
O2 K3 O35C 156.7(11) . . ?  
Na71 K3 O38D 78.1(7) . 2\_567 ?  
O17C K3 O38D 132.3(5) . 2\_567 ?  
O3 K3 O38D 81.2(11) . 2\_567 ?  
Na51 K3 O38D 128.6(7) . 2\_567 ?  
O31D K3 O38D 54.7(5) 2\_567 2\_567 ?  
O2 K3 O38D 140.6(11) . 2\_567 ?  
O35C K3 O38D 61.6(5) . 2\_567 ?  
Na71 K3 Na43 41.5(7) . 2\_567 ?  
O17C K3 Na43 41.4(5) . 2\_567 ?  
O3 K3 Na43 125.9(12) . 2\_567 ?  
Na51 K3 Na43 107.8(7) . 2\_567 ?  
O31D K3 Na43 88.6(5) 2\_567 2\_567 ?  
O2 K3 Na43 44.6(11) . 2\_567 ?  
O35C K3 Na43 126.0(6) . 2\_567 ?  
O38D K3 Na43 119.5(6) 2\_567 2\_567 ?  
Na71 K3 W11D 69.4(6) . 2\_567 ?  
O17C K3 W11D 137.1(4) . 2\_567 ?  
O3 K3 W11D 70.4(11) . 2\_567 ?  
Na51 K3 W11D 146.1(6) . 2\_567 ?  
O31D K3 W11D 28.8(3) 2\_567 2\_567 ?  
O2 K3 W11D 115.0(10) . 2\_567 ?  
O35C K3 W11D 87.5(4) . 2\_567 ?  
O38D K3 W11D 25.9(3) 2\_567 2\_567 ?  
Na43 K3 W11D 106.0(4) 2\_567 2\_567 ?

Na71 K3 W2C 78.3(5) . . ?  
O17C K3 W2C 19.5(3) . . ?  
O3 K3 W2C 151.2(11) . . ?  
Na51 K3 W2C 65.6(5) . . ?  
O31D K3 W2C 143.0(4) 2\_567 . ?  
O2 K3 W2C 83.2(10) . . ?  
O35C K3 W2C 75.4(4) . . ?  
O38D K3 W2C 122.7(4) 2\_567 . ?  
Na43 K3 W2C 59.6(4) 2\_567 . ?  
W11D K3 W2C 138.1(2) 2\_567 . ?  
Na71 K3 Na46 40.3(6) . . ?  
O17C K3 Na46 62.4(5) . . ?  
O3 K3 Na46 150.0(11) . . ?  
Na51 K3 Na46 117.4(6) . . ?  
O31D K3 Na46 92.8(5) 2\_567 . ?  
O2 K3 Na46 109.9(11) . . ?  
O35C K3 Na46 66.2(5) . . ?  
O38D K3 Na46 70.1(5) 2\_567 . ?  
Na43 K3 Na46 65.3(5) 2\_567 . ?  
W11D K3 Na46 79.8(4) 2\_567 . ?  
W2C K3 Na46 58.3(4) . . ?  
Na72 K4 O29B 68.7(6) . 2\_677 ?  
Na72 K4 O37A 105.1(7) . . ?  
O29B K4 O37A 115.1(5) 2\_677 . ?  
Na72 K4 Na31 137.6(8) . . ?  
O29B K4 Na31 149.7(7) 2\_677 . ?  
O37A K4 Na31 77.0(6) . . ?  
Na72 K4 O19A 67.2(6) . . ?  
O29B K4 O19A 132.0(5) 2\_677 . ?  
O37A K4 O19A 93.9(5) . . ?  
Na31 K4 O19A 70.5(6) . . ?  
Na72 K4 O36B 81.6(6) . 2\_677 ?  
O29B K4 O36B 54.3(5) 2\_677 2\_677 ?  
O37A K4 O36B 60.9(5) . 2\_677 ?  
Na31 K4 O36B 130.2(6) . 2\_677 ?  
O19A K4 O36B 133.4(5) . 2\_677 ?  
Na72 K4 Na53 129.3(8) . . ?  
O29B K4 Na53 61.0(6) 2\_677 . ?  
O37A K4 Na53 101.8(6) . . ?  
Na31 K4 Na53 89.9(7) . . ?  
O19A K4 Na53 151.6(6) . . ?  
O36B K4 Na53 75.0(6) 2\_677 . ?  
Na72 K4 O212 118.5(10) . . ?  
O29B K4 O212 79.0(10) 2\_677 . ?  
O37A K4 O212 136.2(9) . . ?  
Na31 K4 O212 74.2(10) . . ?  
O19A K4 O212 106.4(10) . . ?

O36B K4 O212 119.0(10) 2\_677 . ?  
Na53 K4 O212 46.7(10) . . ?  
Na72 K4 W9B 72.6(6) . 2\_677 ?  
O29B K4 W9B 28.4(3) 2\_677 2\_677 ?  
O37A K4 W9B 86.8(4) . 2\_677 ?  
Na31 K4 W9B 148.4(6) . 2\_677 ?  
O19A K4 W9B 138.5(4) . 2\_677 ?  
O36B K4 W9B 26.0(3) 2\_677 2\_677 ?  
Na53 K4 W9B 66.8(5) . 2\_677 ?  
O212 K4 W9B 101.2(9) . 2\_677 ?  
Na72 K4 Na23 40.1(7) . . ?  
O29B K4 Na23 91.5(5) 2\_677 . ?  
O37A K4 Na23 125.7(6) . . ?  
Na31 K4 Na23 103.8(7) . . ?  
O19A K4 Na23 41.4(5) . . ?  
O36B K4 Na23 121.6(6) 2\_677 . ?  
Na53 K4 Na23 132.3(6) . . ?  
O212 K4 Na23 93.0(9) . . ?  
W9B K4 Na23 107.7(4) 2\_677 . ?  
Na72 K4 W10A 99.1(6) . . ?  
O29B K4 W10A 132.4(4) 2\_677 . ?  
O37A K4 W10A 21.0(3) . . ?  
Na31 K4 W10A 67.5(5) . . ?  
O19A K4 W10A 73.2(3) . . ?  
O36B K4 W10A 78.9(3) 2\_677 . ?  
Na53 K4 W10A 119.1(5) . . ?  
O212 K4 W10A 139.5(9) . . ?  
W9B K4 W10A 104.33(19) 2\_677 . ?  
Na23 K4 W10A 108.3(4) . . ?  
Na72 K4 Na34 40.9(6) . 2\_677 ?  
O29B K4 Na34 94.1(5) 2\_677 2\_677 ?  
O37A K4 Na34 65.2(5) . 2\_677 ?  
Na31 K4 Na34 115.9(7) . 2\_677 ?  
O19A K4 Na34 63.2(5) . 2\_677 ?  
O36B K4 Na34 70.5(5) 2\_677 2\_677 ?  
Na53 K4 Na34 145.2(7) . 2\_677 ?  
O212 K4 Na34 158.4(9) . 2\_677 ?  
W9B K4 Na34 79.9(4) 2\_677 2\_677 ?  
Na23 K4 Na34 66.5(5) . 2\_677 ?  
W10A K4 Na34 58.6(4) . 2\_677 ?  
O18 Na1 O46A 79.6(13) . . ?  
O18 Na1 O170 75.8(13) . 1\_565 ?  
O46A Na1 O170 71.8(8) . 1\_565 ?  
O18 Na1 O43B 68.8(12) . 1\_554 ?  
O46A Na1 O43B 148.4(11) . 1\_554 ?  
O170 Na1 O43B 100.4(10) 1\_565 1\_554 ?  
O18 Na1 O49B 102.9(14) . 1\_554 ?

O46A Na1 O49B 140.2(11) . 1\_554 ?  
O170 Na1 O49B 70.6(8) 1\_565 1\_554 ?  
O43B Na1 O49B 53.2(6) 1\_554 1\_554 ?  
Na41 Na2 O10 84.7(17) . . ?  
Na41 Na2 O11 168(2) . . ?  
O10 Na2 O11 87(2) . . ?  
Na41 Na2 O8 85.0(16) . . ?  
O10 Na2 O8 169(2) . . ?  
O11 Na2 O8 103(2) . . ?  
Na41 Na2 O16A 80.6(11) . . ?  
O10 Na2 O16A 99.1(17) . . ?  
O11 Na2 O16A 108.2(17) . . ?  
O8 Na2 O16A 84.2(15) . . ?  
Na41 Na2 O21C 82.7(11) . . ?  
O10 Na2 O21C 88.7(16) . . ?  
O11 Na2 O21C 89.7(16) . . ?  
O8 Na2 O21C 85.0(15) . . ?  
O16A Na2 O21C 160.8(13) . . ?  
Na41 Na2 K2 126.6(11) . . ?  
O10 Na2 K2 77.6(15) . . ?  
O11 Na2 K2 43.6(14) . . ?  
O8 Na2 K2 104.7(15) . . ?  
O16A Na2 K2 151.4(10) . . ?  
O21C Na2 K2 47.4(6) . . ?  
Na41 Na2 Na73 100.1(11) . . ?  
O10 Na2 Na73 38.7(15) . . ?  
O11 Na2 Na73 68.4(15) . . ?  
O8 Na2 Na73 139.3(16) . . ?  
O16A Na2 Na73 136.5(10) . . ?  
O21C Na2 Na73 56.2(7) . . ?  
K2 Na2 Na73 41.0(5) . . ?  
O3D Na3 Na56 126.7(12) . . ?  
O3D Na3 O2A 82.0(9) . . ?  
Na56 Na3 O2A 128.8(12) . . ?  
O3D Na3 O1B 82.1(9) . . ?  
Na56 Na3 O1B 136.6(12) . . ?  
O2A Na3 O1B 81.5(8) . . ?  
O3D Na3 Na45 85.3(9) . . ?  
Na56 Na3 Na45 60.1(9) . . ?  
O2A Na3 Na45 85.9(8) . . ?  
O1B Na3 Na45 163.3(11) . . ?  
O43 Na4 O42 88(2) . . ?  
O43 Na4 O18B 176.7(18) . . ?  
O42 Na4 O18B 94.5(16) . . ?  
O43 Na4 O15 101(2) . . ?  
O42 Na4 O15 108(2) . . ?  
O18B Na4 O15 75.8(15) . . ?

O43 Na4 Na34 102.0(18) . . ?  
O42 Na4 Na34 94.2(16) . . ?  
O18B Na4 Na34 80.3(10) . . ?  
O15 Na4 Na34 148.6(17) . . ?  
O43 Na4 O44 60.3(15) . . ?  
O42 Na4 O44 140.2(17) . . ?  
O18B Na4 O44 116.6(12) . . ?  
O15 Na4 O44 61.5(14) . . ?  
Na34 Na4 O44 114.0(13) . . ?  
O43 Na4 Na80 37.6(14) . 2\_677 ?  
O42 Na4 Na80 105.8(15) . 2\_677 ?  
O18B Na4 Na80 139.1(11) . 2\_677 ?  
O15 Na4 Na80 64.5(13) . 2\_677 ?  
Na34 Na4 Na80 131.4(11) . 2\_677 ?  
O44 Na4 Na80 34.4(7) . 2\_677 ?  
O19B Na5 O20D 124.9(10) . . ?  
O19B Na5 O8D 150.9(11) . . ?  
O20D Na5 O8D 56.4(6) . . ?  
O19B Na5 O7B 56.6(6) . . ?  
O20D Na5 O7B 149.7(11) . . ?  
O8D Na5 O7B 106.5(9) . . ?  
O19B Na5 O66 92.2(13) . . ?  
O20D Na5 O66 94.9(13) . . ?  
O8D Na5 O66 116.9(13) . . ?  
O7B Na5 O66 115.3(13) . . ?  
O19B Na5 W5D 147.8(10) . . ?  
O20D Na5 W5D 26.8(4) . . ?  
O8D Na5 W5D 30.2(4) . . ?  
O7B Na5 W5D 134.7(8) . . ?  
O66 Na5 W5D 102.8(12) . . ?  
O19B Na5 W4B 26.9(4) . . ?  
O20D Na5 W4B 146.6(10) . . ?  
O8D Na5 W4B 134.5(9) . . ?  
O7B Na5 W4B 30.2(4) . . ?  
O66 Na5 W4B 101.4(12) . . ?  
W5D Na5 W4B 155.5(8) . . ?  
O19B Na5 Na37 116.6(10) . . ?  
O20D Na5 Na37 118.2(9) . . ?  
O8D Na5 Na37 73.6(7) . . ?  
O7B Na5 Na37 72.8(7) . . ?  
O66 Na5 Na37 76.3(12) . . ?  
W5D Na5 Na37 94.8(7) . . ?  
W4B Na5 Na37 94.0(7) . . ?  
O19B Na5 Na44 85.2(8) . . ?  
O20D Na5 Na44 41.5(6) . . ?  
O8D Na5 Na44 84.5(7) . . ?  
O7B Na5 Na44 119.7(9) . . ?

O66 Na5 Na44 110.4(12) . . ?  
W5D Na5 Na44 62.9(5) . . ?  
W4B Na5 Na44 105.2(7) . . ?  
Na37 Na5 Na44 157.5(9) . . ?  
O50 Na6 O210 108.9(15) . . ?  
O50 Na6 Na43 102.0(11) . 2\_567 ?  
O210 Na6 Na43 92.8(15) . 2\_567 ?  
O50 Na6 O11C 129.0(12) . . ?  
O210 Na6 O11C 119.4(14) . . ?  
Na43 Na6 O11C 91.3(10) 2\_567 . ?  
O50 Na6 Na54 140.4(11) . 2\_567 ?  
O210 Na6 Na54 62.1(13) . 2\_567 ?  
Na43 Na6 Na54 44.9(8) 2\_567 2\_567 ?  
O11C Na6 Na54 80.4(8) . 2\_567 ?  
O50 Na6 Na46 72.7(9) . . ?  
O210 Na6 Na46 175.7(15) . . ?  
Na43 Na6 Na46 90.7(10) 2\_567 . ?  
O11C Na6 Na46 58.0(7) . . ?  
Na54 Na6 Na46 119.3(10) 2\_567 . ?  
O50 Na6 Na71 70.2(9) . . ?  
O210 Na6 Na71 134.8(15) . . ?  
Na43 Na6 Na71 46.7(8) 2\_567 . ?  
O11C Na6 Na71 85.9(8) . . ?  
Na54 Na6 Na71 89.4(9) 2\_567 . ?  
Na46 Na6 Na71 49.4(7) . . ?  
O54 Na9 O15A 124.7(17) . . ?  
O54 Na9 O53 41.9(17) . . ?  
O15A Na9 O53 108.9(13) . . ?  
O54 Na9 Na14 145.5(17) . . ?  
O15A Na9 Na14 61.1(7) . . ?  
O53 Na9 Na14 169.5(14) . . ?  
O54 Na9 Na41 46.8(15) . . ?  
O15A Na9 Na41 78.5(8) . . ?  
O53 Na9 Na41 59.5(12) . . ?  
Na14 Na9 Na41 118.4(9) . . ?  
O30 Na10 O63 93.1(15) . . ?  
O30 Na10 O33 105.8(11) . . ?  
O63 Na10 O33 99.6(14) . . ?  
O215 Na11 O37 50.9(17) . . ?  
O215 Na11 O53 84.4(17) . . ?  
O37 Na11 O53 116.7(17) . . ?  
O215 Na11 O15B 122.5(16) . . ?  
O37 Na11 O15B 135.2(15) . . ?  
O53 Na11 O15B 104.9(14) . . ?  
O215 Na11 Na73 88.9(14) . 2\_577 ?  
O37 Na11 Na73 73.6(13) . 2\_577 ?  
O53 Na11 Na73 158.0(15) . 2\_577 ?

O15B Na11 Na73 61.6(7) . 2\_577 ?  
O215 Na11 Na55 46.5(13) . . ?  
O37 Na11 Na55 62.4(13) . . ?  
O53 Na11 Na55 120.0(14) . . ?  
O15B Na11 Na55 83.3(8) . . ?  
Na73 Na11 Na55 45.1(7) 2\_577 . ?  
O39 Na12 O145 106.5(18) . . ?  
O23 Na14 Na9 64.4(12) . . ?  
O56 Na15 Na52 92.9(16) . . ?  
O56 Na15 O48 121(2) . . ?  
Na52 Na15 O48 95.6(17) . . ?  
O56 Na15 O34C 117.3(17) . 2\_577 ?  
Na52 Na15 O34C 107.5(12) . 2\_577 ?  
O48 Na15 O34C 114.9(16) . 2\_577 ?  
O56 Na15 O285 93.1(18) . . ?  
Na52 Na15 O285 48.1(12) . . ?  
O48 Na15 O285 54.9(17) . . ?  
O34C Na15 O285 143.7(16) 2\_577 . ?  
O56 Na15 Na35 82.5(15) . 2\_577 ?  
Na52 Na15 Na35 40.6(9) . 2\_577 ?  
O48 Na15 Na35 133.9(17) . 2\_577 ?  
O34C Na15 Na35 77.8(8) 2\_577 2\_577 ?  
O285 Na15 Na35 87.9(12) . 2\_577 ?  
O56 Na15 Na55 46.8(14) . . ?  
Na52 Na15 Na55 80.8(10) . . ?  
O48 Na15 Na55 166.8(17) . . ?  
O34C Na15 Na55 78.3(8) 2\_577 . ?  
O285 Na15 Na55 115.5(13) . . ?  
Na35 Na15 Na55 47.2(7) 2\_577 . ?  
Na33 Na16 O51 106.6(17) . . ?  
Na33 Na16 O44 90.1(12) . 2\_677 ?  
O51 Na16 O44 142.7(16) . 2\_677 ?  
Na33 Na16 O49 100.7(14) . . ?  
O51 Na16 O49 88.8(18) . . ?  
O44 Na16 O49 121.4(15) 2\_677 . ?  
Na33 Na16 O52 54.4(13) . . ?  
O51 Na16 O52 65.3(17) . . ?  
O44 Na16 O52 102.0(14) 2\_677 . ?  
O49 Na16 O52 130.9(17) . . ?  
Na33 Na16 Na80 45.4(9) . . ?  
O51 Na16 Na80 132.6(16) . . ?  
O44 Na16 Na80 45.9(8) 2\_677 . ?  
O49 Na16 Na80 127.9(14) . . ?  
O52 Na16 Na80 67.7(13) . . ?  
Na33 Na16 Na56 81.8(11) . 2\_677 ?  
O51 Na16 Na56 171.6(17) . 2\_677 ?  
O44 Na16 Na56 35.1(7) 2\_677 2\_677 ?

O49 Na16 Na56 89.3(13) . 2\_677 ?  
O52 Na16 Na56 121.6(14) . 2\_677 ?  
Na80 Na16 Na56 53.9(8) . 2\_677 ?  
Na33 Na16 Na56 152.4(12) . . ?  
O51 Na16 Na56 67.8(14) . . ?  
O44 Na16 Na56 110.9(10) 2\_677 . ?  
O49 Na16 Na56 53.4(12) . . ?  
O52 Na16 Na56 132.4(15) . . ?  
Na80 Na16 Na56 156.1(11) . . ?  
Na56 Na16 Na56 104.7(9) 2\_677 . ?  
O29 Na17 O222 131.5(15) . . ?  
O29 Na17 O47D 114.4(14) . . ?  
O222 Na17 O47D 100.4(10) . . ?  
O50B Na22 O47 78.8(12) 1\_544 . ?  
O50B Na22 O55 65.5(8) 1\_544 . ?  
O47 Na22 O55 77.3(13) . . ?  
O50B Na22 O29D 155.4(11) 1\_544 . ?  
O47 Na22 O29D 106.9(13) . . ?  
O55 Na22 O29D 138.8(11) . . ?  
Na45 Na23 Na72 146.8(14) . . ?  
Na45 Na23 O19A 73.2(10) . . ?  
Na72 Na23 O19A 78.3(10) . . ?  
Na45 Na23 O46 80.9(15) . . ?  
Na72 Na23 O46 80.0(15) . . ?  
O19A Na23 O46 85.4(14) . . ?  
Na45 Na23 O68 100.3(12) . . ?  
Na72 Na23 O68 106.9(12) . . ?  
O19A Na23 O68 114.5(11) . . ?  
O46 Na23 O68 159.7(16) . . ?  
Na45 Na23 Na33 103.2(11) . 2\_677 ?  
Na72 Na23 Na33 102.7(11) . 2\_677 ?  
O19A Na23 Na33 172.0(12) . 2\_677 ?  
O46 Na23 Na33 87.0(14) . 2\_677 ?  
O68 Na23 Na33 73.0(9) . 2\_677 ?  
Na45 Na23 Na56 54.6(9) . . ?  
Na72 Na23 Na56 120.8(11) . . ?  
O19A Na23 Na56 106.7(9) . . ?  
O46 Na23 Na56 43.4(12) . . ?  
O68 Na23 Na56 121.6(10) . . ?  
Na33 Na23 Na56 65.8(7) 2\_677 . ?  
Na45 Na23 K4 118.8(10) . . ?  
Na72 Na23 K4 46.5(7) . . ?  
O19A Na23 K4 50.0(6) . . ?  
O46 Na23 K4 111.0(13) . . ?  
O68 Na23 K4 86.3(8) . . ?  
Na33 Na23 K4 135.9(9) 2\_677 . ?  
Na56 Na23 K4 151.4(8) . . ?



Na45 Na23 Na80 69.6(9) . 2\_677 ?  
Na72 Na23 Na80 133.7(11) . 2\_677 ?  
O19A Na23 Na80 142.2(10) . 2\_677 ?  
O46 Na23 Na80 82.6(13) . 2\_677 ?  
O68 Na23 Na80 79.0(8) . 2\_677 ?  
Na33 Na23 Na80 33.6(7) 2\_677 2\_677 ?  
Na56 Na23 Na80 44.2(6) . 2\_677 ?  
K4 Na23 Na80 164.4(8) . 2\_677 ?  
O166 Na24 O109 89(2) . . ?  
O166 Na24 O227 61.5(18) . . ?  
O109 Na24 O227 50.8(17) . . ?  
O166 Na24 O61 103.2(17) . . ?  
O109 Na24 O61 109.4(16) . . ?  
O227 Na24 O61 75.2(13) . . ?  
O213 Na26 O211 88(2) . . ?  
O213 Na26 O2C 178(2) . . ?  
O211 Na26 O2C 91.2(16) . . ?  
O213 Na26 O1A 92.7(16) . . ?  
O211 Na26 O1A 91.7(16) . . ?  
O2C Na26 O1A 88.6(10) . . ?  
O213 Na26 O1D 91.7(16) . . ?  
O211 Na26 O1D 178.4(18) . . ?  
O2C Na26 O1D 89.4(9) . . ?  
O1A Na26 O1D 89.9(10) . . ?  
O213 Na26 O181 88(2) . . ?  
O211 Na26 O181 90(2) . . ?  
O2C Na26 O181 90.9(16) . . ?  
O1A Na26 O181 178.4(18) . . ?  
O1D Na26 O181 88.5(15) . . ?  
O213 Na26 Ti3C 153.7(16) . . ?  
O211 Na26 Ti3C 69.7(14) . . ?  
O2C Na26 Ti3C 26.0(5) . . ?  
O1A Na26 Ti3C 75.3(7) . . ?  
O1D Na26 Ti3C 111.2(9) . . ?  
O181 Na26 Ti3C 104.9(15) . . ?  
O213 Na26 Ti2C 153.6(16) . . ?  
O211 Na26 Ti2C 104.2(15) . . ?  
O2C Na26 Ti2C 25.8(5) . . ?  
O1A Na26 Ti2C 110.1(9) . . ?  
O1D Na26 Ti2C 75.8(7) . . ?  
O181 Na26 Ti2C 69.1(13) . . ?  
Ti3C Na26 Ti2C 50.5(3) . . ?  
O213 Na26 Ti2A 70.8(15) . . ?  
O211 Na26 Ti2A 105.4(15) . . ?  
O2C Na26 Ti2A 110.8(9) . . ?  
O1A Na26 Ti2A 26.7(5) . . ?  
O1D Na26 Ti2A 75.9(7) . . ?

O181 Na26 Ti2A 152.8(16) . . ?  
Ti3C Na26 Ti2A 101.6(6) . . ?  
Ti2C Na26 Ti2A 126.2(7) . . ?  
O213 Na26 Ti1A 104.9(15) . . ?  
O211 Na26 Ti1A 70.7(14) . . ?  
O2C Na26 Ti1A 75.9(7) . . ?  
O1A Na26 Ti1A 25.1(5) . . ?  
O1D Na26 Ti1A 111.0(9) . . ?  
O181 Na26 Ti1A 155.9(16) . . ?  
Ti3C Na26 Ti1A 55.8(4) . . ?  
Ti2C Na26 Ti1A 101.3(6) . . ?  
Ti2A Na26 Ti1A 50.5(3) . . ?  
O213 Na26 Ti1D 70.6(14) . . ?  
O211 Na26 Ti1D 154.5(16) . . ?  
O2C Na26 Ti1D 110.8(9) . . ?  
O1A Na26 Ti1D 76.6(7) . . ?  
O1D Na26 Ti1D 25.9(5) . . ?  
O181 Na26 Ti1D 102.1(15) . . ?  
Ti3C Na26 Ti1D 126.8(7) . . ?  
Ti2C Na26 Ti1D 101.2(6) . . ?  
Ti2A Na26 Ti1D 55.6(4) . . ?  
Ti1A Na26 Ti1D 101.4(6) . . ?  
O213 Na26 Ti2D 104.6(15) . . ?  
O211 Na26 Ti2D 153.4(16) . . ?  
O2C Na26 Ti2D 75.9(7) . . ?  
O1A Na26 Ti2D 110.8(9) . . ?  
O1D Na26 Ti2D 25.6(5) . . ?  
O181 Na26 Ti2D 67.6(13) . . ?  
Ti3C Na26 Ti2D 101.5(6) . . ?  
Ti2C Na26 Ti2D 55.6(4) . . ?  
Ti2A Na26 Ti2D 100.9(6) . . ?  
Ti1A Na26 Ti2D 126.3(7) . . ?  
Ti1D Na26 Ti2D 50.2(3) . . ?  
O93 Na31 O289 105.7(12) 2\_666 . ?  
O93 Na31 K4 127.7(12) 2\_666 . ?  
O289 Na31 K4 96.0(10) . . ?  
O93 Na31 O12A 96.0(11) 2\_666 . ?  
O289 Na31 O12A 133.8(11) . . ?  
K4 Na31 O12A 102.3(8) . . ?  
O93 Na31 O99 45.3(12) 2\_666 2\_666 ?  
O289 Na31 O99 67.4(12) . 2\_666 ?  
K4 Na31 O99 152.0(14) . 2\_666 ?  
O12A Na31 O99 105.4(13) . 2\_666 ?  
O185 Na32 O84 120.2(15) . . ?  
O185 Na32 K1 95.4(13) . . ?  
O84 Na32 K1 97.9(10) . . ?  
Na80 Na33 Na16 87.8(12) . . ?

Na80 Na33 O52 92.3(16) . . ?  
Na16 Na33 O52 74.4(16) . . ?  
Na80 Na33 O91 95.9(17) . . ?  
Na16 Na33 O91 165.6(18) . . ?  
O52 Na33 O91 91.6(19) . . ?  
Na80 Na33 O17B 165.8(14) . . ?  
Na16 Na33 O17B 83.6(11) . . ?  
O52 Na33 O17B 74.5(15) . . ?  
O91 Na33 O17B 89.8(15) . . ?  
Na80 Na33 Na23 96.3(12) . 2\_677 ?  
Na16 Na33 Na23 104.5(12) . 2\_677 ?  
O52 Na33 Na23 171.3(17) . 2\_677 ?  
O91 Na33 Na23 88.9(15) . 2\_677 ?  
O17B Na33 Na23 96.8(10) . 2\_677 ?  
Na80 Na33 Na56 51.4(9) . 2\_677 ?  
Na16 Na33 Na56 60.8(9) . 2\_677 ?  
O52 Na33 Na56 120.2(15) . 2\_677 ?  
O91 Na33 Na56 131.6(16) . 2\_677 ?  
O17B Na33 Na56 131.3(10) . 2\_677 ?  
Na23 Na33 Na56 65.1(8) 2\_677 2\_677 ?  
Na4 Na34 Na72 111.2(12) . 2\_677 ?  
Na4 Na34 K4 146.1(11) . 2\_677 ?  
Na72 Na34 K4 40.4(6) 2\_677 2\_677 ?  
Na52 Na35 Na55 104.0(13) 2\_577 2\_577 ?  
Na52 Na35 O34B 123.7(13) 2\_577 2\_577 ?  
Na55 Na35 O34B 100.4(10) 2\_577 2\_577 ?  
Na52 Na35 O33C 123.6(12) 2\_577 . ?  
Na55 Na35 O33C 73.5(9) 2\_577 . ?  
O34B Na35 O33C 111.7(10) 2\_577 . ?  
Na52 Na35 Na76 51.4(10) 2\_577 . ?  
Na55 Na35 Na76 137.5(12) 2\_577 . ?  
O34B Na35 Na76 76.8(8) 2\_577 . ?  
O33C Na35 Na76 147.5(12) . . ?  
Na52 Na35 Na15 43.8(9) 2\_577 2\_577 ?  
Na55 Na35 Na15 70.1(9) 2\_577 2\_577 ?  
O34B Na35 Na15 156.1(11) 2\_577 2\_577 ?  
O33C Na35 Na15 87.3(8) . 2\_577 ?  
Na76 Na35 Na15 95.2(9) . 2\_577 ?  
O29 Na36 O94 92(2) . . ?  
O29 Na36 O287 107(2) . . ?  
O94 Na36 O287 83(2) . . ?  
O29 Na36 O48B 164.1(18) . 1\_544 ?  
O94 Na36 O48B 81.4(16) . 1\_544 ?  
O287 Na36 O48B 87.1(16) . 1\_544 ?  
O29 Na36 O170 98.1(17) . . ?  
O94 Na36 O170 168.8(19) . . ?  
O287 Na36 O170 89.9(17) . . ?

O48B Na36 O170 89.5(11) 1\_544 . . ?  
O29 Na36 O27 82.4(19) . . ?  
O94 Na36 O27 97(2) . . ?  
O287 Na36 O27 171(2) . . ?  
O48B Na36 O27 83.8(14) 1\_544 . . ?  
O170 Na36 O27 88.8(16) . . ?  
O210 Na37 O2D 133.4(15) . . ?  
O210 Na37 O2B 130.7(15) . . ?  
O2D Na37 O2B 79.1(8) . . ?  
O210 Na37 O1C 133.5(16) . . ?  
O2D Na37 O1C 81.0(8) . . ?  
O2B Na37 O1C 77.6(8) . . ?  
O210 Na37 Na54 63.3(13) . 2\_567 ?  
O2D Na37 Na54 163.2(11) . 2\_567 ?  
O2B Na37 Na54 87.6(9) . 2\_567 ?  
O1C Na37 Na54 86.3(9) . 2\_567 ?  
O210 Na37 Na5 66.2(13) . . ?  
O2D Na37 Na5 85.0(8) . . ?  
O2B Na37 Na5 86.0(8) . . ?  
O1C Na37 Na5 160.1(11) . . ?  
Na54 Na37 Na5 104.3(9) 2\_567 . ?  
O115 Na38 Na47 101.5(11) . 2\_666 ?  
O115 Na38 O289 102.1(11) . . ?  
Na47 Na38 O289 101.3(11) 2\_666 . ?  
O115 Na38 O31C 89.0(10) . 2\_566 ?  
Na47 Na38 O31C 155.9(12) 2\_666 2\_566 ?  
O289 Na38 O31C 97.5(10) . 2\_566 ?  
O115 Na38 Na53 79.1(9) . . ?  
Na47 Na38 Na53 45.5(7) 2\_666 . ?  
O289 Na38 Na53 68.0(8) . . ?  
O31C Na38 Na53 158.5(10) 2\_566 . ?  
Na2 Na41 O54 96.1(16) . . ?  
Na2 Na41 O4A 97.5(11) . . ?  
O54 Na41 O4A 123.5(16) . . ?  
Na2 Na41 O9C 97.2(12) . . ?  
O54 Na41 O9C 125.3(15) . . ?  
O4A Na41 O9C 106.8(9) . . ?  
Na2 Na41 Na75 178.7(13) . . ?  
O54 Na41 Na75 84.9(14) . . ?  
O4A Na41 Na75 82.5(9) . . ?  
O9C Na41 Na75 81.6(8) . . ?  
Na2 Na41 Na9 93.2(11) . . ?  
O54 Na41 Na9 39.5(13) . . ?  
O4A Na41 Na9 85.2(8) . . ?  
O9C Na41 Na9 162.8(10) . . ?  
Na75 Na41 Na9 88.1(9) . . ?  
O119 Na42 K2 93.2(13) . . ?

Na54 Na43 O17C 77.7(10) . 2\_567 ?  
Na54 Na43 Na71 150.9(14) . 2\_567 ?  
O17C Na43 Na71 80.0(10) 2\_567 2\_567 ?  
Na54 Na43 O2 100.4(16) . 2\_567 ?  
O17C Na43 O2 75.4(13) 2\_567 2\_567 ?  
Na71 Na43 O2 91.7(15) 2\_567 2\_567 ?  
Na54 Na43 Na6 80.9(11) . 2\_567 ?  
O17C Na43 Na6 87.9(10) 2\_567 2\_567 ?  
Na71 Na43 Na6 79.8(11) 2\_567 2\_567 ?  
O2 Na43 Na6 162.4(16) 2\_567 2\_567 ?  
Na54 Na43 O30 99.3(12) . . ?  
O17C Na43 O30 116.3(11) 2\_567 . ?  
Na71 Na43 O30 107.3(12) 2\_567 . ?  
O2 Na43 O30 42.1(13) 2\_567 . ?  
Na6 Na43 O30 155.4(13) 2\_567 . ?  
Na54 Na43 K3 122.8(11) . 2\_567 ?  
O17C Na43 K3 49.4(6) 2\_567 2\_567 ?  
Na71 Na43 K3 48.3(8) 2\_567 2\_567 ?  
O2 Na43 K3 52.0(13) 2\_567 2\_567 ?  
Na6 Na43 K3 112.6(10) 2\_567 2\_567 ?  
O30 Na43 K3 88.2(8) . 2\_567 ?  
Na25 Na44 O290 178.9(15) . . ?  
Na25 Na44 O77 80.2(12) . . ?  
O290 Na44 O77 98.7(13) . . ?  
Na25 Na44 O45 96.2(16) . . ?  
O290 Na44 O45 84.9(16) . . ?  
O77 Na44 O45 164.7(18) . . ?  
Na25 Na44 O20D 90.3(11) . . ?  
O290 Na44 O20D 89.4(11) . . ?  
O77 Na44 O20D 77.5(10) . . ?  
O45 Na44 O20D 87.7(15) . . ?  
Na25 Na44 Na5 121.3(11) . . ?  
O290 Na44 Na5 59.1(9) . . ?  
O77 Na44 Na5 114.2(11) . . ?  
O45 Na44 Na5 55.0(14) . . ?  
O20D Na44 Na5 45.5(7) . . ?  
Na25 Na44 Na46 113.5(12) . 2\_567 ?  
O290 Na44 Na46 65.5(10) . 2\_567 ?  
O77 Na44 Na46 42.6(8) . 2\_567 ?  
O45 Na44 Na46 129.2(16) . 2\_567 ?  
O20D Na44 Na46 53.7(7) . 2\_567 ?  
Na5 Na44 Na46 74.2(7) . 2\_567 ?  
Na23 Na45 O4D 136.1(12) . . ?  
Na23 Na45 O7A 107.3(11) . . ?  
O4D Na45 O7A 108.7(9) . . ?  
Na23 Na45 O19A 55.2(8) . . ?  
O4D Na45 O19A 137.7(10) . . ?

O7A Na45 O19A 55.0(6) . . ?  
Na23 Na45 Na56 85.5(11) . . ?  
O4D Na45 Na56 106.4(9) . . ?  
O7A Na45 Na56 107.7(10) . . ?  
O19A Na45 Na56 115.7(10) . . ?  
Na23 Na45 Na3 131.0(12) . . ?  
O4D Na45 Na3 80.1(8) . . ?  
O7A Na45 Na3 79.6(8) . . ?  
O19A Na45 Na3 125.7(10) . . ?  
Na56 Na45 Na3 47.8(7) . . ?  
Na23 Na45 W1D 107.2(10) . . ?  
O4D Na45 W1D 29.0(4) . . ?  
O7A Na45 W1D 132.5(9) . . ?  
O19A Na45 W1D 130.8(8) . . ?  
Na56 Na45 W1D 106.7(8) . . ?  
Na3 Na45 W1D 100.9(8) . . ?  
Na23 Na45 W4A 78.6(9) . . ?  
O4D Na45 W4A 131.9(9) . . ?  
O7A Na45 W4A 28.9(4) . . ?  
O19A Na45 W4A 27.3(4) . . ?  
Na56 Na45 W4A 108.8(8) . . ?  
Na3 Na45 W4A 100.6(8) . . ?  
W1D Na45 W4A 144.4(7) . . ?  
Na23 Na45 Na80 75.3(9) . 2\_677 ?  
O4D Na45 Na80 82.2(7) . 2\_677 ?  
O7A Na45 Na80 155.6(10) . 2\_677 ?  
O19A Na45 Na80 130.0(9) . 2\_677 ?  
Na56 Na45 Na80 47.9(7) . 2\_677 ?  
Na3 Na45 Na80 80.9(8) . 2\_677 ?  
W1D Na45 Na80 66.0(5) . 2\_677 ?  
W4A Na45 Na80 145.8(8) . 2\_677 ?  
O77 Na46 Na71 100.1(11) 2\_567 . ?  
O77 Na46 Na6 165.1(11) 2\_567 . ?  
Na71 Na46 Na6 65.5(9) . . ?  
O77 Na46 Na44 36.1(7) 2\_567 2\_567 ?  
Na71 Na46 Na44 112.7(10) . 2\_567 ?  
Na6 Na46 Na44 143.9(9) . 2\_567 ?  
O77 Na46 K3 80.3(8) 2\_567 . ?  
Na71 Na46 K3 40.2(6) . . ?  
Na6 Na46 K3 90.0(7) . . ?  
Na44 Na46 K3 111.6(7) 2\_567 . ?  
Na38 Na47 Na53 89.6(11) 2\_666 2\_666 ?  
Na38 Na47 O94 96.2(14) 2\_666 . ?  
Na53 Na47 O94 101.9(14) 2\_666 . ?  
Na38 Na47 O25 116.5(15) 2\_666 . ?  
Na53 Na47 O25 113.1(14) 2\_666 . ?  
O94 Na47 O25 131.0(18) . . ?

O106 Na51 K3 94.1(13) 2\_567 . ?  
O106 Na51 O10C 137.0(14) 2\_567 . ?  
K3 Na51 O10C 100.0(8) . . ?  
Na35 Na52 O285 166(2) 2\_577 . ?  
Na35 Na52 O160 93.9(17) 2\_577 . ?  
O285 Na52 O160 99(2) . . ?  
Na35 Na52 Na15 95.6(13) 2\_577 . ?  
O285 Na52 Na15 80.1(17) . . ?  
O160 Na52 Na15 86.7(16) . . ?  
Na35 Na52 Na76 82.2(12) 2\_577 2\_577 ?  
O285 Na52 Na76 102.3(18) . 2\_577 ?  
O160 Na52 Na76 92.5(17) . 2\_577 ?  
Na15 Na52 Na76 177.6(15) . 2\_577 ?  
Na35 Na52 O16B 81.9(11) 2\_577 . ?  
O285 Na52 O16B 85.0(16) . . ?  
O160 Na52 O16B 175.3(18) . . ?  
Na15 Na52 O16B 91.9(11) . . ?  
Na76 Na52 O16B 88.7(11) 2\_577 . ?  
Na35 Na52 Na55 43.2(9) 2\_577 . ?  
O285 Na52 Na55 124.5(17) . . ?  
O160 Na52 Na55 117.5(16) . . ?  
Na15 Na52 Na55 63.2(9) . . ?  
Na76 Na52 Na55 115.3(11) 2\_577 . ?  
O16B Na52 Na55 58.0(7) . . ?  
O212 Na53 O114 132.4(19) . . ?  
O212 Na53 Na47 98.0(15) . 2\_666 ?  
O114 Na53 Na47 90.9(14) . 2\_666 ?  
O212 Na53 O42B 138.0(15) . 2\_677 ?  
O114 Na53 O42B 77.7(13) . 2\_677 ?  
Na47 Na53 O42B 111.8(10) 2\_666 2\_677 ?  
O212 Na53 K4 71.1(13) . . ?  
O114 Na53 K4 78.2(12) . . ?  
Na47 Na53 K4 150.1(11) 2\_666 . ?  
O42B Na53 K4 93.2(8) 2\_677 . ?  
O212 Na53 Na38 75.6(13) . . ?  
O114 Na53 Na38 78.7(13) . . ?  
Na47 Na53 Na38 45.0(8) 2\_666 . ?  
O42B Na53 Na38 146.2(9) 2\_677 . ?  
K4 Na53 Na38 105.2(8) . . ?  
Na43 Na54 O5C 105.0(11) . 2\_567 ?  
Na43 Na54 O8B 137.4(12) . 2\_567 ?  
O5C Na54 O8B 104.9(9) 2\_567 2\_567 ?  
Na43 Na54 Na37 134.0(12) . 2\_567 ?  
O5C Na54 Na37 80.9(8) 2\_567 2\_567 ?  
O8B Na54 Na37 80.4(8) 2\_567 2\_567 ?  
Na43 Na54 Na6 54.2(9) . 2\_567 ?  
O5C Na54 Na6 86.7(8) 2\_567 2\_567 ?

O8B Na54 Na6 156.4(11) 2\_567 2\_567 ?  
Na37 Na54 Na6 81.3(9) 2\_567 2\_567 ?  
O56 Na55 O215 49.0(17) . . ?  
O56 Na55 Na73 112.4(16) . 2\_577 ?  
O215 Na55 Na73 100.7(15) . 2\_577 ?  
O56 Na55 Na35 91.0(15) . 2\_577 ?  
O215 Na55 Na35 139.7(16) . 2\_577 ?  
Na73 Na55 Na35 99.4(11) 2\_577 2\_577 ?  
O56 Na55 Na15 40.9(13) . . ?  
O215 Na55 Na15 80.1(13) . . ?  
Na73 Na55 Na15 141.3(11) 2\_577 . ?  
Na35 Na55 Na15 62.6(8) 2\_577 . ?  
O56 Na55 Na11 60.8(13) . . ?  
O215 Na55 Na11 43.5(12) . . ?  
Na73 Na55 Na11 60.5(8) 2\_577 . ?  
Na35 Na55 Na11 127.4(10) 2\_577 . ?  
Na15 Na55 Na11 101.7(8) . . ?  
O56 Na55 Na52 58.2(13) . . ?  
O215 Na55 Na52 107.0(14) . . ?  
Na73 Na55 Na52 111.4(10) 2\_577 . ?  
Na35 Na55 Na52 32.8(7) 2\_577 . ?  
Na15 Na55 Na52 35.9(6) . . ?  
Na11 Na55 Na52 105.4(8) . . ?  
O56 Na55 K2 149.0(14) . 2\_577 ?  
O215 Na55 K2 135.6(14) . 2\_577 ?  
Na73 Na55 K2 41.7(7) 2\_577 2\_577 ?  
Na35 Na55 K2 80.2(8) 2\_577 2\_577 ?  
Na15 Na55 K2 142.8(8) . 2\_577 ?  
Na11 Na55 K2 101.5(7) . 2\_577 ?  
Na52 Na55 K2 109.2(7) . 2\_577 ?  
O44 Na56 O46 129.1(19) . . ?  
O44 Na56 Na3 117.8(15) . . ?  
O46 Na56 Na3 112.5(16) . . ?  
O44 Na56 O49 48.5(14) . . ?  
O46 Na56 O49 112.6(18) . . ?  
Na3 Na56 O49 103.6(14) . . ?  
O44 Na56 Na80 52.4(11) . 2\_677 ?  
O46 Na56 Na80 109.7(15) . 2\_677 ?  
Na3 Na56 Na80 117.1(12) . 2\_677 ?  
O49 Na56 Na80 100.6(13) . 2\_677 ?  
O44 Na56 Na45 133.0(14) . . ?  
O46 Na56 Na45 69.8(14) . . ?  
Na3 Na56 Na45 72.1(9) . . ?  
O49 Na56 Na45 175.8(15) . . ?  
Na80 Na56 Na45 81.5(9) 2\_677 . ?  
O44 Na56 Na16 55.5(11) . 2\_677 ?  
O46 Na56 Na16 74.0(14) . 2\_677 ?



Na3 Na56 Na16 173.3(12) . 2\_677 ?  
O49 Na56 Na16 71.5(12) . 2\_677 ?  
Na80 Na56 Na16 60.3(8) 2\_677 2\_677 ?  
Na45 Na56 Na16 112.7(10) . 2\_677 ?  
O44 Na56 Na16 94.0(13) . . ?  
O46 Na56 Na16 64.7(13) . . ?  
Na3 Na56 Na16 105.6(10) . . ?  
O49 Na56 Na16 51.4(11) . . ?  
Na80 Na56 Na16 134.2(11) 2\_677 . ?  
Na45 Na56 Na16 129.3(10) . . ?  
Na16 Na56 Na16 75.3(9) 2\_677 . ?  
O44 Na56 Na23 118.7(13) . . ?  
O46 Na56 Na23 43.8(12) . . ?  
Na3 Na56 Na23 110.5(10) . . ?  
O49 Na56 Na23 144.2(14) . . ?  
Na80 Na56 Na23 73.3(8) 2\_677 . ?  
Na45 Na56 Na23 39.9(7) . . ?  
Na16 Na56 Na23 75.2(8) 2\_677 . ?  
Na16 Na56 Na23 107.4(9) . . ?  
O44 Na56 Na33 69.7(11) . 2\_677 ?  
O46 Na56 Na33 74.5(13) . 2\_677 ?  
Na3 Na56 Na33 144.3(11) . 2\_677 ?  
O49 Na56 Na33 105.4(13) . 2\_677 ?  
Na80 Na56 Na33 36.7(7) 2\_677 2\_677 ?  
Na45 Na56 Na33 78.6(8) . 2\_677 ?  
Na16 Na56 Na33 37.4(6) 2\_677 2\_677 ?  
Na16 Na56 Na33 108.7(9) . 2\_677 ?  
Na23 Na56 Na33 49.1(6) . 2\_677 ?  
Na43 Na71 K3 90.2(10) 2\_567 . ?  
Na43 Na71 Na46 110.7(12) 2\_567 . ?  
K3 Na71 Na46 99.4(10) . . ?  
Na43 Na71 Na6 53.5(9) 2\_567 . ?  
K3 Na71 Na6 123.3(9) . . ?  
Na46 Na71 Na6 65.0(9) . . ?  
Na23 Na72 K4 93.4(10) . . ?  
Na23 Na72 Na34 114.3(12) . 2\_677 ?  
K4 Na72 Na34 98.7(9) . 2\_677 ?  
O10 Na73 Na55 122.6(15) . 2\_577 ?  
O10 Na73 K2 96.9(13) . . ?  
Na55 Na73 K2 98.1(10) 2\_577 . ?  
O10 Na73 Na11 78.6(13) . 2\_577 ?  
Na55 Na73 Na11 74.5(9) 2\_577 2\_577 ?  
K2 Na73 Na11 166.6(10) . 2\_577 ?  
O10 Na73 Na2 31.4(12) . . ?  
Na55 Na73 Na2 113.4(10) 2\_577 . ?  
K2 Na73 Na2 67.9(6) . . ?  
Na11 Na73 Na2 104.4(9) 2\_577 . ?

O288 Na74 K1 93.8(13) . . ?  
O53 Na75 O3C 137.7(16) . . ?  
O53 Na75 O3A 128.4(15) . . ?  
O3C Na75 O3A 81.2(8) . . ?  
O53 Na75 O3B 128.8(15) . . ?  
O3C Na75 O3B 80.1(8) . . ?  
O3A Na75 O3B 80.2(8) . . ?  
O53 Na75 Na41 67.0(13) . . ?  
O3C Na75 Na41 88.3(9) . . ?  
O3A Na75 Na41 87.4(9) . . ?  
O3B Na75 Na41 164.1(11) . . ?  
Na52 Na76 O91 114.2(15) 2\_577 2\_577 ?  
Na52 Na76 Na35 46.5(9) 2\_577 . ?  
O91 Na76 Na35 139.4(15) 2\_577 . ?  
Na33 Na80 O44 102.7(13) . 2\_677 ?  
Na33 Na80 O43 102.9(17) . 2\_677 ?  
O44 Na80 O43 59.9(14) 2\_677 2\_677 ?  
Na33 Na80 O15D 128.2(12) . 2\_677 ?  
O44 Na80 O15D 121.9(12) 2\_677 2\_677 ?  
O43 Na80 O15D 120.9(15) 2\_677 2\_677 ?  
Na33 Na80 Na56 91.9(11) . 2\_677 ?  
O44 Na80 Na56 40.4(9) 2\_677 2\_677 ?  
O43 Na80 Na56 100.2(15) 2\_677 2\_677 ?  
O15D Na80 Na56 104.9(10) 2\_677 2\_677 ?  
Na33 Na80 Na16 46.8(9) . . ?  
O44 Na80 Na16 57.4(10) 2\_677 . ?  
O43 Na80 Na16 70.9(14) 2\_677 . ?  
O15D Na80 Na16 167.0(11) 2\_677 . ?  
Na56 Na80 Na16 65.8(9) 2\_677 . ?  
Na33 Na80 Na45 85.2(10) . 2\_677 ?  
O44 Na80 Na45 90.6(10) 2\_677 2\_677 ?  
O43 Na80 Na45 150.4(15) 2\_677 2\_677 ?  
O15D Na80 Na45 70.5(7) 2\_677 2\_677 ?  
Na56 Na80 Na45 50.6(7) 2\_677 2\_677 ?  
Na16 Na80 Na45 96.6(8) . 2\_677 ?  
Na33 Na80 Na4 125.2(12) . 2\_677 ?  
O44 Na80 Na4 38.7(8) 2\_677 2\_677 ?  
O43 Na80 Na4 32.8(13) 2\_677 2\_677 ?  
O15D Na80 Na4 106.5(9) 2\_677 2\_677 ?  
Na56 Na80 Na4 76.1(8) 2\_677 2\_677 ?  
Na16 Na80 Na4 80.6(8) . 2\_677 ?  
Na45 Na80 Na4 120.6(8) 2\_677 2\_677 ?  
Na33 Na80 Na23 50.1(9) . 2\_677 ?  
O44 Na80 Na23 98.3(10) 2\_677 2\_677 ?  
O43 Na80 Na23 143.4(15) 2\_677 2\_677 ?  
O15D Na80 Na23 95.3(8) 2\_677 2\_677 ?  
Na56 Na80 Na23 62.5(7) 2\_677 2\_677 ?

Na16 Na80 Na23 72.6(7) . 2\_677 ?  
Na45 Na80 Na23 35.2(6) 2\_677 2\_677 ?  
Na4 Na80 Na23 137.0(8) 2\_677 2\_677 ?  
Na43 O2 K3 83.5(15) 2\_567 . ?  
Na2 O10 Na73 110(2) . . ?  
Na2 O11 K2 102.8(19) . . ?  
Na36 O29 Na17 111(2) . . ?  
Na10 O30 Na43 165.5(13) . . ?  
Na4 O43 Na80 110(2) . 2\_677 ?  
Na56 O44 Na80 87.2(14) . 2\_677 ?  
Na56 O44 Na4 148.0(16) . . ?  
Na80 O44 Na4 106.9(12) 2\_677 . ?  
Na56 O44 Na16 89.4(13) . 2\_677 ?  
Na80 O44 Na16 76.7(11) 2\_677 2\_677 ?  
Na4 O44 Na16 121.5(12) . 2\_677 ?  
Na56 O46 Na23 92.8(18) . . ?  
Na16 O49 Na56 75.2(14) . . ?  
O282 O51 Na16 108(3) . . ?  
Na33 O52 Na16 51.3(13) . . ?  
Na75 O53 Na11 117(2) . . ?  
Na75 O53 Na9 114.7(19) . . ?  
Na11 O53 Na9 119.2(19) . . ?  
Na9 O54 Na41 94(2) . . ?  
Na15 O56 Na55 92.3(19) . . ?  
Na44 O77 Na46 101.3(12) . 2\_567 ?  
Na33 O91 Na76 108(2) . 2\_577 ?  
Na36 O94 Na47 112(2) . . ?  
Na36 O170 Na1 123.3(12) . 1\_545 ?  
O104 O181 Na26 178(7) . . ?  
Na37 O210 Na6 108.6(19) . . ?  
Na53 O212 K4 62.2(12) . . ?  
Na11 O215 Na55 90.0(17) . . ?  
O209 O227 Na24 112(3) 2\_566 . ?  
Na52 O285 Na15 51.8(13) . . ?  
Na38 O289 Na31 100.4(11) . . ?  
Ti1A O1A Ti2A 114.6(8) . . ?  
Ti1A O1A Na26 121.8(10) . . ?  
Ti2A O1A Na26 119.0(9) . . ?  
Ti3A O2A Ti2A 115.6(7) . . ?  
Ti3A O2A Na3 119.7(9) . . ?  
Ti2A O2A Na3 119.7(8) . . ?  
Ti3A O3A Ti1A 114.6(8) . . ?  
Ti3A O3A Na75 120.5(9) . . ?  
Ti1A O3A Na75 119.7(9) . . ?  
W1A O4A Ti1A 149.5(9) . . ?  
W1A O4A Na41 102.1(8) . . ?  
Ti1A O4A Na41 106.0(8) . . ?

W2A O5A Ti1A 150.4(9) . . ?  
W3A O6A Ti2A 152.5(10) . . ?  
W4A O7A Ti2A 149.8(8) . . ?  
W4A O7A Na45 100.9(8) . . ?  
Ti2A O7A Na45 106.2(8) . . ?  
W5A O8A Ti3A 150.3(9) . . ?  
W6A O9A Ti3A 151.2(8) . . ?  
W1A O10A W2A 144.6(8) . . ?  
W2A O11A W3A 121.9(7) . . ?  
W4A O12A W3A 144.8(8) . . ?  
W4A O12A Na31 105.3(8) . . ?  
W3A O12A Na31 105.1(8) . . ?  
W5A O13A W4A 120.5(8) . . ?  
W6A O14A W5A 145.8(9) . . ?  
W1A O15A W6A 121.7(8) . . ?  
W1A O15A Na9 114.9(9) . . ?  
W6A O15A Na9 121.5(9) . . ?  
W1A O16A Na2 140.2(11) . . ?  
W4A O19A Na23 138.2(10) . . ?  
W4A O19A K4 125.4(7) . . ?  
Na23 O19A K4 88.6(8) . . ?  
W4A O19A Na45 100.4(8) . . ?  
Na23 O19A Na45 51.6(8) . . ?  
K4 O19A Na45 134.2(8) . . ?  
W7A O22A W1A 162.7(9) . . ?  
W8A O23A W2A 162.6(9) . . ?  
W9A O24A W3A 162.4(9) . . ?  
W10A O25A W4A 163.1(9) . . ?  
W11A O26A W5A 162.0(9) . . ?  
W12A O27A W6A 162.7(9) . . ?  
W8A O28A W7A 154.2(10) . . ?  
W9A O29A W8A 123.2(8) . . ?  
W9A O29A K1 103.7(7) . . ?  
W8A O29A K1 133.0(8) . . ?  
W10A O30A W9A 153.5(9) . . ?  
W11A O31A W10A 121.7(9) . . ?  
W12A O32A W11A 153.6(9) . . ?  
W12A O33A W7A 121.9(8) . . ?  
W9A O36A K1 103.3(7) . . ?  
W10A O37A K4 122.1(8) . . ?  
W13A O40A W7A 149.8(9) . . ?  
W13A O41A W8A 150.2(9) . . ?  
W14A O42A W9A 150.1(9) . . ?  
W14A O43A W10A 150.7(9) . . ?  
W15A O44A W11A 151.3(10) . . ?  
W15A O45A W12A 148.7(10) . . ?  
W13A O46A Na1 138.0(11) . . ?

W14A O47A W13A 122.9(9) .. ?  
W14A O49A W15A 122.4(10) .. ?  
W15A O51A W13A 122.8(9) .. ?  
P1A O52A Ti1A 123.7(8) .. ?  
P1A O52A Ti2A 124.2(8) .. ?  
Ti1A O52A Ti2A 91.5(5) .. ?  
P1A O52A Ti3A 123.6(8) .. ?  
Ti1A O52A Ti3A 91.6(5) .. ?  
Ti2A O52A Ti3A 92.9(5) .. ?  
P1A O53A W6A 128.5(8) .. ?  
P1A O53A W1A 127.0(8) .. ?  
W6A O53A W1A 91.5(5) .. ?  
P1A O54A W3A 128.0(8) .. ?  
P1A O54A W2A 127.5(8) .. ?  
W3A O54A W2A 91.2(5) .. ?  
P1A O55A W4A 128.1(8) .. ?  
P1A O55A W5A 127.0(8) .. ?  
W4A O55A W5A 91.9(5) .. ?  
P2A O56A W7A 130.3(9) .. ?  
P2A O56A W12A 127.1(9) .. ?  
W7A O56A W12A 90.7(5) .. ?  
P2A O57A W9A 128.3(9) .. ?  
P2A O57A W8A 129.1(9) .. ?  
W9A O57A W8A 91.0(5) .. ?  
P2A O58A W10A 130.9(9) .. ?  
P2A O58A W11A 126.8(9) .. ?  
W10A O58A W11A 89.9(5) .. ?  
P2A O59A W15A 123.7(8) .. ?  
P2A O59A W13A 123.7(9) .. ?  
W15A O59A W13A 92.3(5) .. ?  
P2A O59A W14A 124.0(8) .. ?  
W15A O59A W14A 92.1(5) .. ?  
W13A O59A W14A 91.8(5) .. ?  
Ti1B O1B Ti2B 117.1(7) .. ?  
Ti1B O1B Na3 118.6(8) .. ?  
Ti2B O1B Na3 118.4(8) .. ?  
Ti2B O2B Ti3B 113.4(7) .. ?  
Ti2B O2B Na37 118.5(8) .. ?  
Ti3B O2B Na37 120.8(9) .. ?  
Ti1B O3B Ti3B 116.5(7) .. ?  
Ti1B O3B Na75 119.1(9) .. ?  
Ti3B O3B Na75 117.7(9) .. ?  
W1B O4B Ti1B 150.1(8) .. ?  
W2B O5B Ti1B 150.8(8) .. ?  
W3B O6B Ti2B 150.4(8) .. ?  
W4B O7B Ti2B 151.1(9) .. ?  
W4B O7B Na5 96.2(7) .. ?

Ti2B O7B Na5 108.0(8) . . ?  
W5B O8B Ti3B 149.3(9) . . ?  
W5B O8B Na54 100.3(7) . 2\_567 ?  
Ti3B O8B Na54 107.7(8) . 2\_567 ?  
W6B O9B Ti3B 150.4(8) . . ?  
W1B O10B W2B 145.4(9) . . ?  
W3B O11B W2B 121.6(8) . . ?  
W3B O12B W4B 144.3(8) . . ?  
W3B O12B Na21 103.4(8) . . ?  
W4B O12B Na21 104.8(8) . . ?  
W4B O13B W5B 123.0(7) . . ?  
W5B O14B W6B 145.5(8) . . ?  
W6B O15B W1B 122.5(8) . . ?  
W6B O15B Na11 109.4(8) . . ?  
W1B O15B Na11 126.7(8) . . ?  
W1B O16B Na52 135.7(10) . . ?  
W2B O17B Na33 165.0(10) . . ?  
W3B O18B Na4 143.8(10) . . ?  
W4B O19B Na5 106.5(9) . . ?  
W7B O22B W1B 161.3(9) . . ?  
W8B O23B W2B 161.6(9) . . ?  
W9B O24B W3B 161.1(8) . . ?  
W10B O25B W4B 163.4(9) . . ?  
W11B O26B W5B 163.3(9) . . ?  
W12B O27B W6B 162.4(9) . . ?  
W8B O28B W7B 154.7(8) . . ?  
W9B O29B W8B 122.2(9) . . ?  
W9B O29B K4 106.5(7) . 2\_677 ?  
W8B O29B K4 130.8(7) . 2\_677 ?  
W10B O30B W9B 153.0(9) . . ?  
W10B O31B W11B 122.2(8) . . ?  
W11B O32B W12B 152.9(10) . . ?  
W12B O33B W7B 122.4(8) . . ?  
W12B O33B K2 129.7(8) . 2\_577 ?  
W7B O33B K2 107.6(7) . 2\_577 ?  
W7B O34B Na35 127.4(10) . 2\_577 ?  
W7B O34B K2 99.8(7) . 2\_577 ?  
Na35 O34B K2 99.1(7) 2\_577 2\_577 ?  
W9B O36B K4 99.9(7) . 2\_677 ?  
W13B O40B W7B 149.0(9) . . ?  
W13B O41B W8B 151.3(10) . . ?  
W14B O42B W9B 150.5(10) . . ?  
W14B O42B Na53 105.9(8) . 2\_677 ?  
W9B O42B Na53 103.2(8) . 2\_677 ?  
W14B O43B W10B 151.0(8) . . ?  
W14B O43B Na1 102.2(8) . 1\_556 ?  
W10B O43B Na1 106.0(8) . 1\_556 ?

W11B O44B W15B 148.9(9) . . ?  
W15B O45B W12B 149.4(9) . . ?  
W13B O47B W14B 121.8(9) . . ?  
W14B O48B Na36 136.6(12) . 1\_566 ?  
W14B O49B W15B 123.4(8) . . ?  
W14B O49B Na1 100.9(8) . 1\_556 ?  
W15B O49B Na1 103.8(8) . 1\_556 ?  
W15B O50B Na22 142.3(11) . 1\_566 ?  
W15B O51B W13B 123.9(9) . . ?  
P1B O52B Ti3B 123.7(8) . . ?  
P1B O52B Ti1B 124.7(8) . . ?  
Ti3B O52B Ti1B 92.8(5) . . ?  
P1B O52B Ti2B 123.1(8) . . ?  
Ti3B O52B Ti2B 91.8(5) . . ?  
Ti1B O52B Ti2B 91.4(5) . . ?  
P1B O53B W1B 128.4(8) . . ?  
P1B O53B W6B 127.8(8) . . ?  
W1B O53B W6B 90.9(5) . . ?  
P1B O54B W3B 128.8(8) . . ?  
P1B O54B W2B 127.1(8) . . ?  
W3B O54B W2B 91.2(5) . . ?  
P1B O55B W4B 127.0(8) . . ?  
P1B O55B W5B 128.2(8) . . ?  
W4B O55B W5B 90.8(5) . . ?  
P2B O56B W7B 128.7(9) . . ?  
P2B O56B W12B 128.9(9) . . ?  
W7B O56B W12B 89.9(5) . . ?  
P2B O57B W8B 131.1(9) . . ?  
P2B O57B W9B 126.6(8) . . ?  
W8B O57B W9B 90.5(5) . . ?  
P2B O58B W11B 129.5(9) . . ?  
P2B O58B W10B 128.9(9) . . ?  
W11B O58B W10B 89.8(5) . . ?  
P2B O59B W13B 125.3(8) . . ?  
P2B O59B W14B 122.9(8) . . ?  
W13B O59B W14B 92.3(5) . . ?  
P2B O59B W15B 123.4(8) . . ?  
W13B O59B W15B 92.2(5) . . ?  
W14B O59B W15B 91.4(5) . . ?  
Ti1C O1C Ti2C 115.2(8) . . ?  
Ti1C O1C Na37 120.7(8) . . ?  
Ti2C O1C Na37 117.5(8) . . ?  
Ti3C O2C Ti2C 115.1(8) . . ?  
Ti3C O2C Na26 119.9(9) . . ?  
Ti2C O2C Na26 120.5(9) . . ?  
Ti1C O3C Ti3C 114.8(8) . . ?  
Ti1C O3C Na75 120.1(8) . . ?

Ti3C O3C Na75 119.5(8) . . ?  
W1C O4C Ti1C 150.1(9) . . ?  
W2C O5C Ti1C 150.8(8) . . ?  
W2C O5C Na54 100.2(7) . 2\_567 ?  
Ti1C O5C Na54 107.0(8) . 2\_567 ?  
W3C O6C Ti2C 151.1(8) . . ?  
W4C O7C Ti2C 151.3(8) . . ?  
W5C O8C Ti3C 151.9(9) . . ?  
W6C O9C Ti3C 149.1(8) . . ?  
W6C O9C Na41 101.7(8) . . ?  
Ti3C O9C Na41 105.9(8) . . ?  
W2C O10C W1C 144.5(9) . . ?  
W2C O10C Na51 105.4(7) . . ?  
W1C O10C Na51 105.2(8) . . ?  
W2C O11C W3C 122.2(7) . . ?  
W2C O11C Na6 115.8(8) . . ?  
W3C O11C Na6 117.4(8) . . ?  
W3C O12C W4C 144.1(9) . . ?  
W4C O13C W5C 122.1(7) . . ?  
W6C O14C W5C 144.3(9) . . ?  
W1C O15C W6C 121.8(8) . . ?  
W2C O17C Na43 137.6(10) . 2\_567 ?  
W2C O17C K3 126.9(8) . . ?  
Na43 O17C K3 89.2(8) 2\_567 . ?  
W4C O19C K1 124.4(7) . 2\_566 ?  
W6C O21C Na2 138.0(11) . . ?  
W6C O21C K2 124.9(8) . . ?  
Na2 O21C K2 94.6(8) . . ?  
W7C O22C W1C 161.2(9) . . ?  
W8C O23C W2C 161.0(9) . . ?  
W9C O24C W3C 161.7(9) . . ?  
W10C O25C W4C 162.0(8) . . ?  
W11C O26C W5C 162.3(9) . . ?  
W12C O27C W6C 161.8(10) . . ?  
W8C O28C W7C 154.8(9) . . ?  
W8C O29C W9C 122.6(8) . . ?  
W10C O30C W9C 154.7(9) . . ?  
W11C O31C W10C 122.5(8) . . ?  
W11C O31C Na38 105.4(8) . 2\_566 ?  
W10C O31C Na38 108.1(8) . 2\_566 ?  
W12C O32C W11C 156.7(9) . . ?  
W7C O33C W12C 121.3(8) . . ?  
W7C O33C Na35 124.4(9) . . ?  
W12C O33C Na35 112.1(8) . . ?  
W7C O34C Na15 142.1(11) . 2\_577 ?  
W8C O35C K3 120.3(8) . . ?  
W10C O37C K1 120.4(9) . 2\_566 ?



W12C O39C K2 123.3(9) . . ?  
W13C O40C W7C 150.1(9) . . ?  
W13C O41C W8C 150.2(10) . . ?  
W14C O42C W9C 151.0(10) . . ?  
W14C O43C W10C 150.4(9) . . ?  
W15C O44C W11C 150.7(10) . . ?  
W15C O45C W12C 149.7(9) . . ?  
W13C O47C W14C 122.1(9) . . ?  
W15C O49C W14C 122.6(9) . . ?  
W13C O51C W15C 123.8(9) . . ?  
P1C O52C Ti2C 124.6(8) . . ?  
P1C O52C Ti3C 123.9(8) . . ?  
Ti2C O52C Ti3C 90.2(5) . . ?  
P1C O52C Ti1C 124.3(8) . . ?  
Ti2C O52C Ti1C 91.7(5) . . ?  
Ti3C O52C Ti1C 92.4(5) . . ?  
P1C O53C W6C 127.5(8) . . ?  
P1C O53C W1C 126.7(8) . . ?  
W6C O53C W1C 91.6(5) . . ?  
P1C O54C W2C 128.3(8) . . ?  
P1C O54C W3C 126.7(8) . . ?  
W2C O54C W3C 91.5(5) . . ?  
P1C O55C W4C 127.6(8) . . ?  
P1C O55C W5C 126.5(8) . . ?  
W4C O55C W5C 91.3(5) . . ?  
P2C O56C W7C 129.2(8) . . ?  
P2C O56C W12C 128.7(8) . . ?  
W7C O56C W12C 91.0(5) . . ?  
P2C O57C W9C 129.8(8) . . ?  
P2C O57C W8C 129.2(9) . . ?  
W9C O57C W8C 89.9(5) . . ?  
P2C O58C W11C 129.0(8) . . ?  
P2C O58C W10C 128.4(8) . . ?  
W11C O58C W10C 90.6(5) . . ?  
P2C O59C W13C 123.7(8) . . ?  
P2C O59C W14C 124.9(8) . . ?  
W13C O59C W14C 91.6(5) . . ?  
P2C O59C W15C 123.5(8) . . ?  
W13C O59C W15C 91.9(5) . . ?  
W14C O59C W15C 91.8(5) . . ?  
Ti2D O1D Ti1D 114.3(7) . . ?  
Ti2D O1D Na26 121.1(9) . . ?  
Ti1D O1D Na26 120.6(9) . . ?  
Ti3D O2D Ti2D 116.0(7) . . ?  
Ti3D O2D Na37 120.3(8) . . ?  
Ti2D O2D Na37 117.4(9) . . ?  
Ti3D O3D Ti1D 114.5(7) . . ?

Ti3D O3D Na3 119.2(8) . . ?  
Ti1D O3D Na3 121.2(8) . . ?  
W1D O4D Ti1D 150.1(9) . . ?  
W1D O4D Na45 101.2(8) . . ?  
Ti1D O4D Na45 106.1(8) . . ?  
W2D O5D Ti1D 151.2(9) . . ?  
W3D O6D Ti2D 151.4(8) . . ?  
W4D O7D Ti2D 150.4(9) . . ?  
W5D O8D Ti3D 151.2(8) . . ?  
W5D O8D Na5 96.7(7) . . ?  
Ti3D O8D Na5 108.4(8) . . ?  
W6D O9D Ti3D 149.1(9) . . ?  
W2D O10D W1D 147.0(8) . . ?  
W3D O11D W2D 122.9(7) . . ?  
W4D O12D W3D 144.1(9) . . ?  
W5D O13D W4D 122.9(7) . . ?  
W5D O14D W6D 146.8(9) . . ?  
W1D O15D W6D 121.7(9) . . ?  
W1D O15D Na80 126.1(9) . 2\_677 ?  
W6D O15D Na80 111.1(8) . 2\_677 ?  
W5D O20D Na44 132.7(11) . . ?  
W5D O20D Na5 104.3(9) . . ?  
Na44 O20D Na5 93.1(9) . . ?  
W7D O22D W1D 163.0(9) . . ?  
W8D O23D W2D 162.8(9) . . ?  
W9D O24D W3D 161.8(9) . . ?  
W10D O25D W4D 163.2(9) . . ?  
W11D O26D W5D 161.7(9) . . ?  
W12D O27D W6D 162.8(9) . . ?  
W8D O28D W7D 153.6(9) . . ?  
W9D O29D W8D 122.8(9) . . ?  
W9D O29D Na22 112.0(8) . . ?  
W8D O29D Na22 101.9(8) . . ?  
W9D O30D W10D 151.8(9) . . ?  
W11D O31D W10D 121.7(8) . . ?  
W11D O31D K3 104.3(6) . 2\_567 ?  
W10D O31D K3 133.5(8) . 2\_567 ?  
W11D O32D W12D 153.2(9) . . ?  
W7D O33D W12D 121.1(10) . . ?  
W11D O38D K3 103.1(7) . 2\_567 ?  
W7D O40D W13D 148.8(10) . . ?  
W13D O41D W8D 149.9(10) . . ?  
W14D O42D W9D 149.1(9) . . ?  
W14D O43D W10D 150.2(9) . . ?  
W15D O44D W11D 149.0(10) . . ?  
W15D O45D W12D 150.0(10) . . ?  
W13D O47D W14D 122.4(9) . . ?

W13D O47D Na17 107.6(9) . . ?  
W14D O47D Na17 103.2(8) . . ?  
W14D O49D W15D 122.9(9) . . ?  
W15D O51D W13D 121.4(9) . . ?  
P1D O52D Ti2D 123.8(8) . . ?  
P1D O52D Ti1D 123.3(7) . . ?  
Ti2D O52D Ti1D 91.2(5) . . ?  
P1D O52D Ti3D 123.8(7) . . ?  
Ti2D O52D Ti3D 92.7(5) . . ?  
Ti1D O52D Ti3D 92.9(5) . . ?  
P1D O53D W6D 127.8(7) . . ?  
P1D O53D W1D 127.5(7) . . ?  
W6D O53D W1D 92.0(5) . . ?  
P1D O54D W2D 127.6(8) . . ?  
P1D O54D W3D 128.3(8) . . ?  
W2D O54D W3D 91.1(5) . . ?  
P1D O55D W4D 127.6(8) . . ?  
P1D O55D W5D 128.4(8) . . ?  
W4D O55D W5D 91.5(5) . . ?  
P2D O56D W12D 129.3(8) . . ?  
P2D O56D W7D 127.8(8) . . ?  
W12D O56D W7D 91.3(5) . . ?  
P2D O57D W8D 128.5(9) . . ?  
P2D O57D W9D 127.3(8) . . ?  
W8D O57D W9D 90.8(5) . . ?  
P2D O58D W11D 128.7(9) . . ?  
P2D O58D W10D 128.7(9) . . ?  
W11D O58D W10D 90.8(5) . . ?  
P2D O59D W13D 123.8(8) . . ?  
P2D O59D W14D 124.9(9) . . ?  
W13D O59D W14D 91.9(5) . . ?  
P2D O59D W15D 123.6(8) . . ?  
W13D O59D W15D 91.5(5) . . ?  
W14D O59D W15D 91.6(5) . . ?  
Ti3A O1E Ti1B 155.1(10) . . ?  
Ti3B O2E Ti1C 153.2(9) . . ?  
Ti2D O3E Ti2C 154.3(9) . . ?  
Ti1D O4E Ti2A 154.4(9) . . ?  
Ti3D O5E Ti2B 154.2(9) . . ?  
Ti3C O6E Ti1A 151.5(9) . . ?  
O53A P1A O54A 112.2(8) . . ?  
O53A P1A O55A 111.6(8) . . ?  
O54A P1A O55A 111.0(8) . . ?  
O53A P1A O52A 107.6(8) . . ?  
O54A P1A O52A 107.3(8) . . ?  
O55A P1A O52A 106.9(8) . . ?  
O58A P2A O57A 110.8(9) . . ?

O58A P2A O56A 114.4(9) .. ?  
O57A P2A O56A 110.7(9) .. ?  
O58A P2A O59A 107.0(9) .. ?  
O57A P2A O59A 106.6(9) .. ?  
O56A P2A O59A 106.7(9) .. ?  
O54B P1B O53B 111.9(9) .. ?  
O54B P1B O55B 111.1(8) .. ?  
O53B P1B O55B 111.0(8) .. ?  
O54B P1B O52B 107.6(8) .. ?  
O53B P1B O52B 106.6(8) .. ?  
O55B P1B O52B 108.4(8) .. ?  
O58B P2B O57B 114.1(9) .. ?  
O58B P2B O56B 111.6(9) .. ?  
O57B P2B O56B 110.4(9) .. ?  
O58B P2B O59B 107.8(8) .. ?  
O57B P2B O59B 106.2(9) .. ?  
O56B P2B O59B 106.2(8) .. ?  
O54C P1C O53C 111.1(8) .. ?  
O54C P1C O55C 111.3(8) .. ?  
O53C P1C O55C 111.0(8) .. ?  
O54C P1C O52C 107.1(8) .. ?  
O53C P1C O52C 107.9(8) .. ?  
O55C P1C O52C 108.2(8) .. ?  
O57C P2C O56C 112.6(9) .. ?  
O57C P2C O58C 112.3(9) .. ?  
O56C P2C O58C 112.5(8) .. ?  
O57C P2C O59C 105.9(9) .. ?  
O56C P2C O59C 106.8(9) .. ?  
O58C P2C O59C 106.2(9) .. ?  
O55D P1D O54D 111.5(8) .. ?  
O55D P1D O53D 111.4(8) .. ?  
O54D P1D O53D 111.8(8) .. ?  
O55D P1D O52D 106.9(8) .. ?  
O54D P1D O52D 107.6(8) .. ?  
O53D P1D O52D 107.2(8) .. ?  
O57D P2D O58D 112.2(9) .. ?  
O57D P2D O56D 111.8(9) .. ?  
O58D P2D O56D 111.5(9) .. ?  
O57D P2D O59D 107.2(9) .. ?  
O58D P2D O59D 106.5(8) .. ?  
O56D P2D O59D 107.3(9) .. ?  
O6E Ti1A O1A 98.2(7) .. ?  
O6E Ti1A O5A 97.4(7) .. ?  
O1A Ti1A O5A 91.3(6) .. ?  
O6E Ti1A O3A 98.2(7) .. ?  
O1A Ti1A O3A 90.4(7) .. ?  
O5A Ti1A O3A 164.0(7) .. ?

O6E Ti1A O4A 96.9(7) . . ?  
O1A Ti1A O4A 164.8(7) . . ?  
O5A Ti1A O4A 84.3(6) . . ?  
O3A Ti1A O4A 89.9(6) . . ?  
O6E Ti1A O52A 173.7(6) . . ?  
O1A Ti1A O52A 77.5(6) . . ?  
O5A Ti1A O52A 87.4(6) . . ?  
O3A Ti1A O52A 77.4(6) . . ?  
O4A Ti1A O52A 87.7(6) . . ?  
O6E Ti1A Na26 69.2(6) . . ?  
O1A Ti1A Na26 33.1(6) . . ?  
O5A Ti1A Na26 79.9(6) . . ?  
O3A Ti1A Na26 109.4(6) . . ?  
O4A Ti1A Na26 157.2(6) . . ?  
O52A Ti1A Na26 107.8(6) . . ?  
O4E Ti2A O1A 99.9(7) . . ?  
O4E Ti2A O6A 99.4(7) . . ?  
O1A Ti2A O6A 92.3(7) . . ?  
O4E Ti2A O2A 97.5(6) . . ?  
O1A Ti2A O2A 88.9(6) . . ?  
O6A Ti2A O2A 162.6(7) . . ?  
O4E Ti2A O7A 96.8(7) . . ?  
O1A Ti2A O7A 163.2(6) . . ?  
O6A Ti2A O7A 82.9(6) . . ?  
O2A Ti2A O7A 91.0(6) . . ?  
O4E Ti2A O52A 172.7(6) . . ?  
O1A Ti2A O52A 76.4(6) . . ?  
O6A Ti2A O52A 87.1(6) . . ?  
O2A Ti2A O52A 76.3(5) . . ?  
O7A Ti2A O52A 87.3(6) . . ?  
O4E Ti2A Na26 70.0(6) . . ?  
O1A Ti2A Na26 34.3(6) . . ?  
O6A Ti2A Na26 81.1(6) . . ?  
O2A Ti2A Na26 108.8(6) . . ?  
O7A Ti2A Na26 157.2(6) . . ?  
O52A Ti2A Na26 108.0(6) . . ?  
O1E Ti3A O3A 97.0(7) . . ?  
O1E Ti3A O2A 96.7(6) . . ?  
O3A Ti3A O2A 89.3(7) . . ?  
O1E Ti3A O9A 101.2(7) . . ?  
O3A Ti3A O9A 92.3(7) . . ?  
O2A Ti3A O9A 161.7(6) . . ?  
O1E Ti3A O8A 101.0(7) . . ?  
O3A Ti3A O8A 162.0(6) . . ?  
O2A Ti3A O8A 90.0(6) . . ?  
O9A Ti3A O8A 82.9(6) . . ?  
O1E Ti3A O52A 169.4(6) . . ?

O3A Ti3A O52A 76.4(6) .. ?  
O2A Ti3A O52A 75.1(5) .. ?  
O9A Ti3A O52A 87.6(6) .. ?  
O8A Ti3A O52A 86.0(6) .. ?  
O1E Ti1B O3B 98.7(7) .. ?  
O1E Ti1B O1B 98.6(7) .. ?  
O3B Ti1B O1B 88.3(6) .. ?  
O1E Ti1B O5B 99.4(7) .. ?  
O3B Ti1B O5B 161.8(6) .. ?  
O1B Ti1B O5B 91.1(6) .. ?  
O1E Ti1B O4B 98.9(6) .. ?  
O3B Ti1B O4B 91.9(6) .. ?  
O1B Ti1B O4B 162.3(6) .. ?  
O5B Ti1B O4B 83.1(6) .. ?  
O1E Ti1B O52B 172.1(7) .. ?  
O3B Ti1B O52B 75.5(6) .. ?  
O1B Ti1B O52B 76.1(6) .. ?  
O5B Ti1B O52B 86.7(6) .. ?  
O4B Ti1B O52B 86.8(5) .. ?  
O5E Ti2B O1B 98.7(6) .. ?  
O5E Ti2B O7B 99.4(6) .. ?  
O1B Ti2B O7B 161.8(6) .. ?  
O5E Ti2B O6B 97.5(7) .. ?  
O1B Ti2B O6B 92.7(6) .. ?  
O7B Ti2B O6B 83.2(6) .. ?  
O5E Ti2B O2B 98.2(7) .. ?  
O1B Ti2B O2B 88.8(6) .. ?  
O7B Ti2B O2B 90.4(6) .. ?  
O6B Ti2B O2B 163.8(6) .. ?  
O5E Ti2B O52B 172.4(6) .. ?  
O1B Ti2B O52B 75.4(6) .. ?  
O7B Ti2B O52B 86.7(6) .. ?  
O6B Ti2B O52B 87.7(6) .. ?  
O2B Ti2B O52B 77.0(6) .. ?  
O2E Ti3B O8B 97.6(7) .. ?  
O2E Ti3B O3B 98.6(6) .. ?  
O8B Ti3B O3B 163.6(7) .. ?  
O2E Ti3B O9B 98.4(6) .. ?  
O8B Ti3B O9B 84.8(6) .. ?  
O3B Ti3B O9B 90.3(6) .. ?  
O2E Ti3B O2B 97.5(7) .. ?  
O8B Ti3B O2B 92.3(6) .. ?  
O3B Ti3B O2B 88.0(6) .. ?  
O9B Ti3B O2B 164.0(6) .. ?  
O2E Ti3B O52B 172.3(6) .. ?  
O8B Ti3B O52B 88.7(6) .. ?  
O3B Ti3B O52B 75.3(6) .. ?

O9B Ti3B O52B 86.5(6) .. ?  
O2B Ti3B O52B 77.7(6) .. ?  
O2E Ti1C O3C 97.3(7) .. ?  
O2E Ti1C O1C 98.5(7) .. ?  
O3C Ti1C O1C 88.7(6) .. ?  
O2E Ti1C O5C 99.3(6) .. ?  
O3C Ti1C O5C 163.1(7) .. ?  
O1C Ti1C O5C 92.1(6) .. ?  
O2E Ti1C O4C 98.7(7) .. ?  
O3C Ti1C O4C 90.9(6) .. ?  
O1C Ti1C O4C 162.8(7) .. ?  
O5C Ti1C O4C 83.5(6) .. ?  
O2E Ti1C O52C 171.9(6) .. ?  
O3C Ti1C O52C 76.6(6) .. ?  
O1C Ti1C O52C 76.2(6) .. ?  
O5C Ti1C O52C 87.2(6) .. ?  
O4C Ti1C O52C 86.9(6) .. ?  
O3E Ti2C O2C 99.2(7) .. ?  
O3E Ti2C O1C 97.7(7) .. ?  
O2C Ti2C O1C 89.6(6) .. ?  
O3E Ti2C O7C 98.6(7) .. ?  
O2C Ti2C O7C 91.9(6) .. ?  
O1C Ti2C O7C 163.2(7) .. ?  
O3E Ti2C O6C 97.4(6) .. ?  
O2C Ti2C O6C 163.1(7) .. ?  
O1C Ti2C O6C 91.2(6) .. ?  
O7C Ti2C O6C 82.6(6) .. ?  
O3E Ti2C O52C 173.5(7) .. ?  
O2C Ti2C O52C 77.4(6) .. ?  
O1C Ti2C O52C 76.8(6) .. ?  
O7C Ti2C O52C 87.2(6) .. ?  
O6C Ti2C O52C 86.3(6) .. ?  
O3E Ti2C Na26 69.9(6) .. ?  
O2C Ti2C Na26 33.7(6) .. ?  
O1C Ti2C Na26 109.2(6) .. ?  
O7C Ti2C Na26 80.6(6) .. ?  
O6C Ti2C Na26 156.9(6) .. ?  
O52C Ti2C Na26 108.4(5) .. ?  
O6E Ti3C O2C 100.3(7) .. ?  
O6E Ti3C O8C 97.3(7) .. ?  
O2C Ti3C O8C 93.3(6) .. ?  
O6E Ti3C O3C 98.4(7) .. ?  
O2C Ti3C O3C 89.4(6) .. ?  
O8C Ti3C O3C 163.3(7) .. ?  
O6E Ti3C O9C 96.2(6) .. ?  
O2C Ti3C O9C 163.5(6) .. ?  
O8C Ti3C O9C 83.4(6) .. ?

O3C Ti3C O9C 89.3(6) . . ?  
O6E Ti3C O52C 174.0(6) . . ?  
O2C Ti3C O52C 77.3(6) . . ?  
O8C Ti3C O52C 88.3(6) . . ?  
O3C Ti3C O52C 76.2(6) . . ?  
O9C Ti3C O52C 86.4(6) . . ?  
O6E Ti3C Na26 70.4(6) . . ?  
O2C Ti3C Na26 34.1(6) . . ?  
O8C Ti3C Na26 81.3(6) . . ?  
O3C Ti3C Na26 109.4(6) . . ?  
O9C Ti3C Na26 158.1(6) . . ?  
O52C Ti3C Na26 108.7(5) . . ?  
O4E Ti1D O1D 98.3(7) . . ?  
O4E Ti1D O5D 100.5(7) . . ?  
O1D Ti1D O5D 91.5(6) . . ?  
O4E Ti1D O4D 97.6(7) . . ?  
O1D Ti1D O4D 164.0(6) . . ?  
O5D Ti1D O4D 83.4(7) . . ?  
O4E Ti1D O3D 96.0(6) . . ?  
O1D Ti1D O3D 89.4(6) . . ?  
O5D Ti1D O3D 163.2(6) . . ?  
O4D Ti1D O3D 91.2(6) . . ?  
O4E Ti1D O52D 170.9(6) . . ?  
O1D Ti1D O52D 76.8(5) . . ?  
O5D Ti1D O52D 87.4(6) . . ?  
O4D Ti1D O52D 87.7(6) . . ?  
O3D Ti1D O52D 76.5(5) . . ?  
O4E Ti1D Na26 69.0(6) . . ?  
O1D Ti1D Na26 33.6(5) . . ?  
O5D Ti1D Na26 81.2(6) . . ?  
O4D Ti1D Na26 157.2(6) . . ?  
O3D Ti1D Na26 108.0(6) . . ?  
O52D Ti1D Na26 108.2(5) . . ?  
O3E Ti2D O1D 97.9(6) . . ?  
O3E Ti2D O6D 98.5(7) . . ?  
O1D Ti2D O6D 93.2(6) . . ?  
O3E Ti2D O2D 97.5(7) . . ?  
O1D Ti2D O2D 89.8(6) . . ?  
O6D Ti2D O2D 163.1(7) . . ?  
O3E Ti2D O7D 98.2(7) . . ?  
O1D Ti2D O7D 163.9(7) . . ?  
O6D Ti2D O7D 83.2(6) . . ?  
O2D Ti2D O7D 89.3(6) . . ?  
O3E Ti2D O52D 171.9(6) . . ?  
O1D Ti2D O52D 77.7(6) . . ?  
O6D Ti2D O52D 88.6(6) . . ?  
O2D Ti2D O52D 75.9(6) . . ?



O7D Ti2D O52D 86.5(6) . . ?  
O3E Ti2D Na26 68.6(6) . . ?  
O1D Ti2D Na26 33.3(6) . . ?  
O6D Ti2D Na26 82.2(6) . . ?  
O2D Ti2D Na26 108.7(6) . . ?  
O7D Ti2D Na26 158.6(6) . . ?  
O52D Ti2D Na26 108.8(5) . . ?  
O5E Ti3D O8D 99.3(6) . . ?  
O5E Ti3D O2D 97.4(7) . . ?  
O8D Ti3D O2D 92.0(6) . . ?  
O5E Ti3D O9D 100.5(7) . . ?  
O8D Ti3D O9D 84.5(6) . . ?  
O2D Ti3D O9D 162.0(6) . . ?  
O5E Ti3D O3D 97.7(7) . . ?  
O8D Ti3D O3D 162.7(6) . . ?  
O2D Ti3D O3D 89.1(6) . . ?  
O9D Ti3D O3D 89.2(6) . . ?  
O5E Ti3D O52D 170.5(6) . . ?  
O8D Ti3D O52D 87.5(6) . . ?  
O2D Ti3D O52D 75.4(6) . . ?  
O9D Ti3D O52D 86.8(6) . . ?  
O3D Ti3D O52D 76.1(5) . . ?  
O16A W1A O4A 99.0(7) . . ?  
O16A W1A O10A 102.8(7) . . ?  
O4A W1A O10A 90.4(7) . . ?  
O16A W1A O15A 98.2(7) . . ?  
O4A W1A O15A 93.0(7) . . ?  
O10A W1A O15A 157.9(7) . . ?  
O16A W1A O22A 97.0(7) . . ?  
O4A W1A O22A 163.9(7) . . ?  
O10A W1A O22A 84.2(6) . . ?  
O15A W1A O22A 86.6(7) . . ?  
O16A W1A O53A 171.6(7) . . ?  
O4A W1A O53A 82.2(6) . . ?  
O10A W1A O53A 85.4(6) . . ?  
O15A W1A O53A 73.4(6) . . ?  
O22A W1A O53A 82.3(6) . . ?  
O17A W2A O5A 101.1(7) . . ?  
O17A W2A O11A 98.8(7) . . ?  
O5A W2A O11A 92.5(6) . . ?  
O17A W2A O10A 102.4(7) . . ?  
O5A W2A O10A 90.3(6) . . ?  
O11A W2A O10A 157.6(7) . . ?  
O17A W2A O23A 96.3(7) . . ?  
O5A W2A O23A 162.6(7) . . ?  
O11A W2A O23A 85.7(6) . . ?  
O10A W2A O23A 84.9(6) . . ?

O17A W2A O54A 172.3(6) . . ?  
O5A W2A O54A 81.0(6) . . ?  
O11A W2A O54A 73.6(6) . . ?  
O10A W2A O54A 84.9(6) . . ?  
O23A W2A O54A 81.8(6) . . ?  
O18A W3A O6A 99.4(7) . . ?  
O18A W3A O12A 102.3(7) . . ?  
O6A W3A O12A 89.2(7) . . ?  
O18A W3A O11A 100.1(7) . . ?  
O6A W3A O11A 94.4(7) . . ?  
O12A W3A O11A 156.5(6) . . ?  
O18A W3A O24A 97.7(7) . . ?  
O6A W3A O24A 162.6(7) . . ?  
O12A W3A O24A 84.0(6) . . ?  
O11A W3A O24A 85.8(6) . . ?  
O18A W3A O54A 173.4(6) . . ?  
O6A W3A O54A 81.7(6) . . ?  
O12A W3A O54A 84.3(6) . . ?  
O11A W3A O54A 73.3(5) . . ?  
O24A W3A O54A 81.7(5) . . ?  
O19A W4A O7A 99.9(7) . . ?  
O19A W4A O12A 101.8(7) . . ?  
O7A W4A O12A 90.1(6) . . ?  
O19A W4A O13A 99.3(7) . . ?  
O7A W4A O13A 93.0(6) . . ?  
O12A W4A O13A 157.8(6) . . ?  
O19A W4A O25A 95.5(7) . . ?  
O7A W4A O25A 164.5(6) . . ?  
O12A W4A O25A 84.3(6) . . ?  
O13A W4A O25A 87.0(6) . . ?  
O19A W4A O55A 173.0(7) . . ?  
O7A W4A O55A 82.3(6) . . ?  
O12A W4A O55A 84.8(6) . . ?  
O13A W4A O55A 73.9(6) . . ?  
O25A W4A O55A 82.8(6) . . ?  
O19A W4A Na45 52.3(6) . . ?  
O7A W4A Na45 50.3(6) . . ?  
O12A W4A Na45 112.6(6) . . ?  
O13A W4A Na45 85.9(6) . . ?  
O25A W4A Na45 145.1(6) . . ?  
O55A W4A Na45 127.4(5) . . ?  
O20A W5A O8A 100.1(7) . . ?  
O20A W5A O14A 101.7(7) . . ?  
O8A W5A O14A 89.6(7) . . ?  
O20A W5A O13A 99.3(7) . . ?  
O8A W5A O13A 94.1(6) . . ?  
O14A W5A O13A 157.7(6) . . ?

O20A W5A O26A 95.3(7) . . ?  
O8A W5A O26A 164.5(7) . . ?  
O14A W5A O26A 85.2(6) . . ?  
O13A W5A O26A 85.5(6) . . ?  
O20A W5A O55A 172.6(7) . . ?  
O8A W5A O55A 83.1(6) . . ?  
O14A W5A O55A 85.0(6) . . ?  
O13A W5A O55A 73.7(6) . . ?  
O26A W5A O55A 81.9(6) . . ?  
O21A W6A O9A 99.0(7) . . ?  
O21A W6A O14A 102.2(7) . . ?  
O9A W6A O14A 88.9(6) . . ?  
O21A W6A O15A 99.8(7) . . ?  
O9A W6A O15A 93.6(7) . . ?  
O14A W6A O15A 157.1(6) . . ?  
O21A W6A O27A 96.7(7) . . ?  
O9A W6A O27A 164.0(6) . . ?  
O14A W6A O27A 84.9(6) . . ?  
O15A W6A O27A 86.6(7) . . ?  
O21A W6A O53A 173.1(7) . . ?  
O9A W6A O53A 83.0(6) . . ?  
O14A W6A O53A 84.4(6) . . ?  
O15A W6A O53A 73.4(6) . . ?  
O27A W6A O53A 81.7(6) . . ?  
O34A W7A O22A 100.5(8) . . ?  
O34A W7A O33A 100.1(8) . . ?  
O22A W7A O33A 92.1(7) . . ?  
O34A W7A O28A 102.0(8) . . ?  
O22A W7A O28A 90.1(7) . . ?  
O33A W7A O28A 157.0(7) . . ?  
O34A W7A O40A 96.6(7) . . ?  
O22A W7A O40A 162.8(7) . . ?  
O33A W7A O40A 86.4(7) . . ?  
O28A W7A O40A 84.8(7) . . ?  
O34A W7A O56A 173.2(7) . . ?  
O22A W7A O56A 82.9(6) . . ?  
O33A W7A O56A 73.8(6) . . ?  
O28A W7A O56A 83.8(6) . . ?  
O40A W7A O56A 80.3(6) . . ?  
O35A W8A O28A 102.0(8) . . ?  
O35A W8A O23A 100.2(8) . . ?  
O28A W8A O23A 89.6(7) . . ?  
O35A W8A O29A 101.1(8) . . ?  
O28A W8A O29A 156.3(7) . . ?  
O23A W8A O29A 91.6(7) . . ?  
O35A W8A O41A 97.6(8) . . ?  
O28A W8A O41A 85.2(7) . . ?

O23A W8A O41A 162.1(7) . . ?  
O29A W8A O41A 86.5(7) . . ?  
O35A W8A O57A 173.0(7) . . ?  
O28A W8A O57A 84.5(7) . . ?  
O23A W8A O57A 82.2(6) . . ?  
O29A W8A O57A 72.2(6) . . ?  
O41A W8A O57A 80.3(6) . . ?  
O36A W9A O24A 100.4(7) . . ?  
O36A W9A O29A 98.4(7) . . ?  
O24A W9A O29A 91.5(7) . . ?  
O36A W9A O30A 103.3(7) . . ?  
O24A W9A O30A 90.2(7) . . ?  
O29A W9A O30A 157.5(7) . . ?  
O36A W9A O42A 96.4(7) . . ?  
O24A W9A O42A 163.1(7) . . ?  
O29A W9A O42A 86.8(7) . . ?  
O30A W9A O42A 85.2(7) . . ?  
O36A W9A O57A 171.0(6) . . ?  
O24A W9A O57A 82.6(6) . . ?  
O29A W9A O57A 73.0(6) . . ?  
O30A W9A O57A 85.0(6) . . ?  
O42A W9A O57A 80.8(6) . . ?  
O36A W9A K1 50.9(5) . . ?  
O24A W9A K1 100.0(5) . . ?  
O29A W9A K1 47.6(5) . . ?  
O30A W9A K1 153.4(5) . . ?  
O42A W9A K1 91.2(5) . . ?  
O57A W9A K1 120.4(4) . . ?  
O37A W10A O25A 99.8(7) . . ?  
O37A W10A O30A 101.5(7) . . ?  
O25A W10A O30A 89.1(7) . . ?  
O37A W10A O31A 100.7(7) . . ?  
O25A W10A O31A 92.1(7) . . ?  
O30A W10A O31A 157.2(7) . . ?  
O37A W10A O43A 96.7(7) . . ?  
O25A W10A O43A 163.2(7) . . ?  
O30A W10A O43A 84.7(6) . . ?  
O31A W10A O43A 87.8(6) . . ?  
O37A W10A O58A 174.8(7) . . ?  
O25A W10A O58A 82.5(6) . . ?  
O30A W10A O58A 83.1(6) . . ?  
O31A W10A O58A 74.5(6) . . ?  
O43A W10A O58A 81.3(6) . . ?  
O37A W10A K4 36.9(5) . . ?  
O25A W10A K4 64.1(5) . . ?  
O30A W10A K4 91.4(5) . . ?  
O31A W10A K4 109.5(5) . . ?

O43A W10A K4 131.5(5) . . ?  
O58A W10A K4 146.2(4) . . ?  
O38A W11A O26A 101.0(7) . . ?  
O38A W11A O32A 101.2(8) . . ?  
O26A W11A O32A 90.4(7) . . ?  
O38A W11A O31A 99.9(8) . . ?  
O26A W11A O31A 92.5(7) . . ?  
O32A W11A O31A 157.7(7) . . ?  
O38A W11A O44A 96.3(8) . . ?  
O26A W11A O44A 162.6(7) . . ?  
O32A W11A O44A 84.2(7) . . ?  
O31A W11A O44A 86.6(7) . . ?  
O38A W11A O58A 172.2(7) . . ?  
O26A W11A O58A 82.9(6) . . ?  
O32A W11A O58A 85.4(6) . . ?  
O31A W11A O58A 73.1(6) . . ?  
O44A W11A O58A 80.2(6) . . ?  
O39A W12A O27A 100.3(8) . . ?  
O39A W12A O32A 101.3(8) . . ?  
O27A W12A O32A 89.9(7) . . ?  
O39A W12A O33A 100.0(8) . . ?  
O27A W12A O33A 92.0(7) . . ?  
O32A W12A O33A 157.9(7) . . ?  
O39A W12A O45A 96.8(8) . . ?  
O27A W12A O45A 162.9(7) . . ?  
O32A W12A O45A 85.7(7) . . ?  
O33A W12A O45A 86.1(7) . . ?  
O39A W12A O56A 172.5(7) . . ?  
O27A W12A O56A 82.4(6) . . ?  
O32A W12A O56A 85.6(6) . . ?  
O33A W12A O56A 72.8(6) . . ?  
O45A W12A O56A 80.8(6) . . ?  
O46A W13A O40A 102.6(8) . . ?  
O46A W13A O41A 102.8(8) . . ?  
O40A W13A O41A 88.1(7) . . ?  
O46A W13A O51A 100.5(8) . . ?  
O40A W13A O51A 88.6(7) . . ?  
O41A W13A O51A 156.6(7) . . ?  
O46A W13A O47A 100.9(8) . . ?  
O40A W13A O47A 156.4(7) . . ?  
O41A W13A O47A 88.7(7) . . ?  
O51A W13A O47A 85.2(8) . . ?  
O46A W13A O59A 170.2(8) . . ?  
O40A W13A O59A 84.2(6) . . ?  
O41A W13A O59A 84.3(6) . . ?  
O51A W13A O59A 72.4(6) . . ?  
O47A W13A O59A 72.2(6) . . ?

O48A W14A O42A 103.3(8) . . ?  
O48A W14A O43A 102.3(8) . . ?  
O42A W14A O43A 87.2(7) . . ?  
O48A W14A O47A 100.2(8) . . ?  
O42A W14A O47A 88.7(7) . . ?  
O43A W14A O47A 157.5(7) . . ?  
O48A W14A O49A 99.6(9) . . ?  
O42A W14A O49A 157.1(7) . . ?  
O43A W14A O49A 89.1(7) . . ?  
O47A W14A O49A 86.1(8) . . ?  
O48A W14A O59A 170.1(8) . . ?  
O42A W14A O59A 84.0(6) . . ?  
O43A W14A O59A 84.5(6) . . ?  
O47A W14A O59A 73.0(6) . . ?  
O49A W14A O59A 73.1(7) . . ?  
O50A W15A O44A 102.8(9) . . ?  
O50A W15A O45A 102.5(8) . . ?  
O44A W15A O45A 87.9(7) . . ?  
O50A W15A O51A 100.3(8) . . ?  
O44A W15A O51A 156.9(8) . . ?  
O45A W15A O51A 88.2(7) . . ?  
O50A W15A O49A 100.5(9) . . ?  
O44A W15A O49A 89.9(7) . . ?  
O45A W15A O49A 156.9(8) . . ?  
O51A W15A O49A 84.9(8) . . ?  
O50A W15A O59A 170.0(7) . . ?  
O44A W15A O59A 84.5(7) . . ?  
O45A W15A O59A 84.5(7) . . ?  
O51A W15A O59A 72.4(6) . . ?  
O49A W15A O59A 72.4(7) . . ?  
O16B W1B O4B 100.0(7) . . ?  
O16B W1B O10B 102.8(7) . . ?  
O4B W1B O10B 90.3(6) . . ?  
O16B W1B O15B 99.5(7) . . ?  
O4B W1B O15B 92.1(6) . . ?  
O10B W1B O15B 156.8(6) . . ?  
O16B W1B O22B 95.9(7) . . ?  
O4B W1B O22B 164.0(6) . . ?  
O10B W1B O22B 85.3(6) . . ?  
O15B W1B O22B 86.2(6) . . ?  
O16B W1B O53B 172.6(7) . . ?  
O4B W1B O53B 82.2(5) . . ?  
O10B W1B O53B 84.2(6) . . ?  
O15B W1B O53B 73.3(6) . . ?  
O22B W1B O53B 82.1(5) . . ?  
O17B W2B O5B 100.7(7) . . ?  
O17B W2B O10B 102.9(7) . . ?

O5B W2B O10B 89.1(7) . . ?  
O17B W2B O11B 98.8(7) . . ?  
O5B W2B O11B 94.5(6) . . ?  
O10B W2B O11B 156.9(6) . . ?  
O17B W2B O23B 95.2(7) . . ?  
O5B W2B O23B 164.0(6) . . ?  
O10B W2B O23B 85.0(6) . . ?  
O11B W2B O23B 85.3(6) . . ?  
O17B W2B O54B 171.7(6) . . ?  
O5B W2B O54B 82.8(6) . . ?  
O10B W2B O54B 84.6(6) . . ?  
O11B W2B O54B 73.3(6) . . ?  
O23B W2B O54B 81.8(6) . . ?  
O18B W3B O6B 99.1(7) . . ?  
O18B W3B O12B 102.0(7) . . ?  
O6B W3B O12B 90.5(6) . . ?  
O18B W3B O11B 99.7(7) . . ?  
O6B W3B O11B 93.1(6) . . ?  
O12B W3B O11B 157.1(6) . . ?  
O18B W3B O24B 96.0(7) . . ?  
O6B W3B O24B 164.8(6) . . ?  
O12B W3B O24B 84.8(6) . . ?  
O11B W3B O24B 85.8(6) . . ?  
O18B W3B O54B 173.5(7) . . ?  
O6B W3B O54B 82.3(6) . . ?  
O12B W3B O54B 84.2(5) . . ?  
O11B W3B O54B 73.9(6) . . ?  
O24B W3B O54B 82.8(5) . . ?  
O19B W4B O7B 99.4(7) . . ?  
O19B W4B O13B 100.0(7) . . ?  
O7B W4B O13B 95.4(6) . . ?  
O19B W4B O12B 101.9(7) . . ?  
O7B W4B O12B 89.0(6) . . ?  
O13B W4B O12B 156.6(6) . . ?  
O19B W4B O25B 96.1(7) . . ?  
O7B W4B O25B 164.0(6) . . ?  
O13B W4B O25B 86.0(6) . . ?  
O12B W4B O25B 83.7(6) . . ?  
O19B W4B O55B 173.3(7) . . ?  
O7B W4B O55B 83.1(5) . . ?  
O13B W4B O55B 73.5(5) . . ?  
O12B W4B O55B 84.3(5) . . ?  
O25B W4B O55B 82.0(5) . . ?  
O19B W4B Na5 46.6(7) . . ?  
O7B W4B Na5 53.6(6) . . ?  
O13B W4B Na5 94.3(6) . . ?  
O12B W4B Na5 106.8(6) . . ?

O25B W4B Na5 142.2(6) . . ?  
O55B W4B Na5 134.2(5) . . ?  
O20B W5B O8B 99.6(7) . . ?  
O20B W5B O14B 102.3(7) . . ?  
O8B W5B O14B 89.6(6) . . ?  
O20B W5B O13B 99.8(7) . . ?  
O8B W5B O13B 91.3(6) . . ?  
O14B W5B O13B 157.4(7) . . ?  
O20B W5B O26B 97.6(7) . . ?  
O8B W5B O26B 162.8(7) . . ?  
O14B W5B O26B 85.5(6) . . ?  
O13B W5B O26B 86.9(6) . . ?  
O20B W5B O55B 172.5(6) . . ?  
O8B W5B O55B 81.3(6) . . ?  
O14B W5B O55B 85.1(6) . . ?  
O13B W5B O55B 72.7(6) . . ?  
O26B W5B O55B 81.8(6) . . ?  
O21B W6B O9B 100.7(7) . . ?  
O21B W6B O14B 101.8(7) . . ?  
O9B W6B O14B 89.4(6) . . ?  
O21B W6B O15B 99.1(7) . . ?  
O9B W6B O15B 93.0(6) . . ?  
O14B W6B O15B 158.2(7) . . ?  
O21B W6B O27B 95.4(7) . . ?  
O9B W6B O27B 163.7(6) . . ?  
O14B W6B O27B 85.0(6) . . ?  
O15B W6B O27B 86.8(7) . . ?  
O21B W6B O53B 172.2(6) . . ?  
O9B W6B O53B 81.4(6) . . ?  
O14B W6B O53B 85.7(6) . . ?  
O15B W6B O53B 73.2(6) . . ?  
O27B W6B O53B 82.9(6) . . ?  
O34B W7B O22B 99.2(7) . . ?  
O34B W7B O28B 102.4(8) . . ?  
O22B W7B O28B 90.9(7) . . ?  
O34B W7B O33B 99.2(8) . . ?  
O22B W7B O33B 90.5(7) . . ?  
O28B W7B O33B 157.8(6) . . ?  
O34B W7B O40B 97.0(7) . . ?  
O22B W7B O40B 163.8(7) . . ?  
O28B W7B O40B 84.9(6) . . ?  
O33B W7B O40B 87.6(7) . . ?  
O34B W7B O56B 172.7(7) . . ?  
O22B W7B O56B 82.2(6) . . ?  
O28B W7B O56B 84.7(6) . . ?  
O33B W7B O56B 73.6(6) . . ?  
O40B W7B O56B 81.8(6) . . ?



O34B W7B K2 54.5(6) . 2\_577 ?  
O22B W7B K2 97.3(5) . 2\_577 ?  
O28B W7B K2 156.4(5) . 2\_577 ?  
O33B W7B K2 44.7(5) . 2\_577 ?  
O40B W7B K2 92.7(5) . 2\_577 ?  
O56B W7B K2 118.3(4) . 2\_577 ?  
O35B W8B O23B 101.1(7) . . ?  
O35B W8B O28B 102.8(7) . . ?  
O23B W8B O28B 91.0(7) . . ?  
O35B W8B O29B 100.0(8) . . ?  
O23B W8B O29B 90.6(7) . . ?  
O28B W8B O29B 156.3(7) . . ?  
O35B W8B O41B 97.3(8) . . ?  
O23B W8B O41B 161.5(7) . . ?  
O28B W8B O41B 83.6(7) . . ?  
O29B W8B O41B 87.4(7) . . ?  
O35B W8B O57B 173.0(7) . . ?  
O23B W8B O57B 81.8(6) . . ?  
O28B W8B O57B 83.4(6) . . ?  
O29B W8B O57B 73.5(6) . . ?  
O41B W8B O57B 80.0(6) . . ?  
O36B W9B O24B 100.2(7) . . ?  
O36B W9B O30B 101.4(7) . . ?  
O24B W9B O30B 90.6(7) . . ?  
O36B W9B O29B 99.2(8) . . ?  
O24B W9B O29B 90.5(6) . . ?  
O30B W9B O29B 158.9(7) . . ?  
O36B W9B O42B 96.7(7) . . ?  
O24B W9B O42B 163.1(6) . . ?  
O30B W9B O42B 85.2(7) . . ?  
O29B W9B O42B 87.6(7) . . ?  
O36B W9B O57B 171.9(7) . . ?  
O24B W9B O57B 83.2(6) . . ?  
O30B W9B O57B 85.9(6) . . ?  
O29B W9B O57B 73.3(6) . . ?  
O42B W9B O57B 80.2(6) . . ?  
O36B W9B K4 54.1(6) . 2\_677 ?  
O24B W9B K4 95.1(5) . 2\_677 ?  
O30B W9B K4 155.4(5) . 2\_677 ?  
O29B W9B K4 45.2(5) . 2\_677 ?  
O42B W9B K4 95.4(5) . 2\_677 ?  
O57B W9B K4 118.5(4) . 2\_677 ?  
O37B W10B O25B 99.9(7) . . ?  
O37B W10B O30B 101.9(8) . . ?  
O25B W10B O30B 89.5(7) . . ?  
O37B W10B O31B 99.5(8) . . ?  
O25B W10B O31B 91.8(7) . . ?

O30B W10B O31B 157.9(7) . . ?  
O37B W10B O43B 98.2(7) . . ?  
O25B W10B O43B 161.8(6) . . ?  
O30B W10B O43B 84.9(7) . . ?  
O31B W10B O43B 87.0(7) . . ?  
O37B W10B O58B 172.8(7) . . ?  
O25B W10B O58B 83.1(6) . . ?  
O30B W10B O58B 84.6(6) . . ?  
O31B W10B O58B 73.8(6) . . ?  
O43B W10B O58B 79.2(6) . . ?  
O38B W11B O26B 100.4(8) . . ?  
O38B W11B O32B 101.7(8) . . ?  
O26B W11B O32B 88.7(7) . . ?  
O38B W11B O44B 96.6(8) . . ?  
O26B W11B O44B 162.9(7) . . ?  
O32B W11B O44B 86.2(7) . . ?  
O38B W11B O31B 100.0(7) . . ?  
O26B W11B O31B 90.6(6) . . ?  
O32B W11B O31B 158.1(7) . . ?  
O44B W11B O31B 88.1(7) . . ?  
O38B W11B O58B 173.4(7) . . ?  
O26B W11B O58B 82.0(6) . . ?  
O32B W11B O58B 84.5(6) . . ?  
O44B W11B O58B 81.3(6) . . ?  
O31B W11B O58B 73.7(6) . . ?  
O39B W12B O27B 100.5(8) . . ?  
O39B W12B O32B 101.6(8) . . ?  
O27B W12B O32B 90.0(7) . . ?  
O39B W12B O33B 100.3(8) . . ?  
O27B W12B O33B 91.7(7) . . ?  
O32B W12B O33B 157.3(7) . . ?  
O39B W12B O45B 96.2(8) . . ?  
O27B W12B O45B 163.3(7) . . ?  
O32B W12B O45B 85.5(7) . . ?  
O33B W12B O45B 86.4(7) . . ?  
O39B W12B O56B 173.1(7) . . ?  
O27B W12B O56B 82.9(6) . . ?  
O32B W12B O56B 84.3(6) . . ?  
O33B W12B O56B 73.5(6) . . ?  
O45B W12B O56B 80.7(6) . . ?  
O46B W13B O41B 103.1(8) . . ?  
O46B W13B O47B 99.7(8) . . ?  
O41B W13B O47B 90.7(7) . . ?  
O46B W13B O40B 102.2(8) . . ?  
O41B W13B O40B 87.3(7) . . ?  
O47B W13B O40B 157.9(7) . . ?  
O46B W13B O51B 100.3(8) . . ?

O41B W13B O51B 156.6(7) .. ?  
O47B W13B O51B 85.5(7) .. ?  
O40B W13B O51B 87.7(7) .. ?  
O46B W13B O59B 170.1(7) .. ?  
O41B W13B O59B 84.5(6) .. ?  
O47B W13B O59B 73.6(6) .. ?  
O40B W13B O59B 84.3(6) .. ?  
O51B W13B O59B 72.3(6) .. ?  
O48B W14B O43B 103.7(8) .. ?  
O48B W14B O42B 103.3(8) .. ?  
O43B W14B O42B 87.5(7) .. ?  
O48B W14B O49B 100.5(8) .. ?  
O43B W14B O49B 89.4(7) .. ?  
O42B W14B O49B 156.0(7) .. ?  
O48B W14B O47B 99.6(8) .. ?  
O43B W14B O47B 156.7(7) .. ?  
O42B W14B O47B 88.5(7) .. ?  
O49B W14B O47B 84.9(7) .. ?  
O48B W14B O59B 169.7(7) .. ?  
O43B W14B O59B 84.5(6) .. ?  
O42B W14B O59B 83.1(6) .. ?  
O49B W14B O59B 72.9(6) .. ?  
O47B W14B O59B 72.3(6) .. ?  
O50B W15B O45B 102.7(8) .. ?  
O50B W15B O51B 100.7(8) .. ?  
O45B W15B O51B 88.6(7) .. ?  
O50B W15B O44B 102.7(8) .. ?  
O45B W15B O44B 88.2(7) .. ?  
O51B W15B O44B 156.5(7) .. ?  
O50B W15B O49B 100.3(8) .. ?  
O45B W15B O49B 156.9(7) .. ?  
O51B W15B O49B 85.6(7) .. ?  
O44B W15B O49B 88.3(7) .. ?  
O50B W15B O59B 169.5(8) .. ?  
O45B W15B O59B 84.7(6) .. ?  
O51B W15B O59B 71.6(6) .. ?  
O44B W15B O59B 84.9(6) .. ?  
O49B W15B O59B 72.3(6) .. ?  
O16C W1C O4C 99.3(7) .. ?  
O16C W1C O10C 102.6(7) .. ?  
O4C W1C O10C 90.0(6) .. ?  
O16C W1C O15C 99.3(7) .. ?  
O4C W1C O15C 94.2(6) .. ?  
O10C W1C O15C 156.8(6) .. ?  
O16C W1C O22C 96.9(7) .. ?  
O4C W1C O22C 163.7(6) .. ?  
O10C W1C O22C 85.0(6) .. ?

O15C W1C O22C 84.6(6) .. ?  
O16C W1C O53C 172.4(6) .. ?  
O4C W1C O53C 83.1(6) .. ?  
O10C W1C O53C 84.6(5) .. ?  
O15C W1C O53C 73.2(5) .. ?  
O22C W1C O53C 81.0(6) .. ?  
O17C W2C O5C 101.0(7) .. ?  
O17C W2C O10C 103.3(7) .. ?  
O5C W2C O10C 90.2(6) .. ?  
O17C W2C O11C 98.7(7) .. ?  
O5C W2C O11C 94.2(6) .. ?  
O10C W2C O11C 156.3(6) .. ?  
O17C W2C O23C 94.1(7) .. ?  
O5C W2C O23C 164.8(6) .. ?  
O10C W2C O23C 84.5(6) .. ?  
O11C W2C O23C 85.3(6) .. ?  
O17C W2C O54C 171.8(6) .. ?  
O5C W2C O54C 82.4(6) .. ?  
O10C W2C O54C 84.0(6) .. ?  
O11C W2C O54C 73.5(5) .. ?  
O23C W2C O54C 82.9(5) .. ?  
O17C W2C K3 33.6(5) .. ?  
O5C W2C K3 131.9(4) .. ?  
O10C W2C K3 88.8(5) .. ?  
O11C W2C K3 105.2(4) .. ?  
O23C W2C K3 62.4(4) .. ?  
O54C W2C K3 145.1(4) .. ?  
O18C W3C O6C 101.6(7) .. ?  
O18C W3C O12C 101.0(7) .. ?  
O6C W3C O12C 90.0(6) .. ?  
O18C W3C O11C 100.1(6) .. ?  
O6C W3C O11C 94.3(6) .. ?  
O12C W3C O11C 157.1(6) .. ?  
O18C W3C O24C 94.9(7) .. ?  
O6C W3C O24C 163.3(6) .. ?  
O12C W3C O24C 85.1(6) .. ?  
O11C W3C O24C 84.4(6) .. ?  
O18C W3C O54C 172.3(6) .. ?  
O6C W3C O54C 82.3(6) .. ?  
O12C W3C O54C 85.6(6) .. ?  
O11C W3C O54C 72.8(5) .. ?  
O24C W3C O54C 81.5(6) .. ?  
O19C W4C O7C 100.6(7) .. ?  
O19C W4C O12C 102.8(7) .. ?  
O7C W4C O12C 90.1(6) .. ?  
O19C W4C O13C 98.6(6) .. ?  
O7C W4C O13C 93.3(6) .. ?

O12C W4C O13C 157.3(6) . . ?  
O19C W4C O25C 95.7(7) . . ?  
O7C W4C O25C 163.6(6) . . ?  
O12C W4C O25C 84.2(6) . . ?  
O13C W4C O25C 86.3(6) . . ?  
O19C W4C O55C 172.0(6) . . ?  
O7C W4C O55C 82.3(6) . . ?  
O12C W4C O55C 84.6(6) . . ?  
O13C W4C O55C 73.7(5) . . ?  
O25C W4C O55C 81.9(6) . . ?  
O19C W4C K1 35.6(5) . 2\_566 ?  
O7C W4C K1 134.3(5) . 2\_566 ?  
O12C W4C K1 89.7(5) . 2\_566 ?  
O13C W4C K1 103.7(4) . 2\_566 ?  
O25C W4C K1 61.3(4) . 2\_566 ?  
O55C W4C K1 143.1(4) . 2\_566 ?  
O20C W5C O8C 100.6(7) . . ?  
O20C W5C O14C 102.1(7) . . ?  
O8C W5C O14C 88.9(7) . . ?  
O20C W5C O13C 99.9(7) . . ?  
O8C W5C O13C 94.1(6) . . ?  
O14C W5C O13C 156.9(6) . . ?  
O20C W5C O26C 96.1(7) . . ?  
O8C W5C O26C 163.1(6) . . ?  
O14C W5C O26C 85.0(6) . . ?  
O13C W5C O26C 85.6(6) . . ?  
O20C W5C O55C 172.4(6) . . ?  
O8C W5C O55C 82.4(6) . . ?  
O14C W5C O55C 84.8(5) . . ?  
O13C W5C O55C 72.8(5) . . ?  
O26C W5C O55C 81.4(5) . . ?  
O21C W6C O9C 101.4(7) . . ?  
O21C W6C O14C 102.4(7) . . ?  
O9C W6C O14C 91.5(6) . . ?  
O21C W6C O15C 98.9(7) . . ?  
O9C W6C O15C 92.8(6) . . ?  
O14C W6C O15C 157.0(6) . . ?  
O21C W6C O27C 94.8(7) . . ?  
O9C W6C O27C 163.8(6) . . ?  
O14C W6C O27C 84.1(7) . . ?  
O15C W6C O27C 85.5(6) . . ?  
O21C W6C O53C 171.7(6) . . ?  
O9C W6C O53C 82.0(6) . . ?  
O14C W6C O53C 85.0(6) . . ?  
O15C W6C O53C 73.3(5) . . ?  
O27C W6C O53C 82.0(6) . . ?  
O34C W7C O22C 100.9(8) . . ?

O34C W7C O28C 102.0(7) .. ?  
O22C W7C O28C 90.7(7) .. ?  
O34C W7C O33C 99.3(8) .. ?  
O22C W7C O33C 92.4(7) .. ?  
O28C W7C O33C 157.5(7) .. ?  
O34C W7C O40C 97.0(8) .. ?  
O22C W7C O40C 162.1(7) .. ?  
O28C W7C O40C 84.3(7) .. ?  
O33C W7C O40C 86.0(7) .. ?  
O34C W7C O56C 172.5(7) .. ?  
O22C W7C O56C 82.2(6) .. ?  
O28C W7C O56C 84.7(6) .. ?  
O33C W7C O56C 73.6(6) .. ?  
O40C W7C O56C 80.2(6) .. ?  
O35C W8C O23C 99.2(7) .. ?  
O35C W8C O28C 102.1(7) .. ?  
O23C W8C O28C 91.5(7) .. ?  
O35C W8C O29C 100.4(7) .. ?  
O23C W8C O29C 91.2(7) .. ?  
O28C W8C O29C 156.6(6) .. ?  
O35C W8C O41C 97.9(8) .. ?  
O23C W8C O41C 162.9(7) .. ?  
O28C W8C O41C 84.8(7) .. ?  
O29C W8C O41C 85.8(7) .. ?  
O35C W8C O57C 173.2(7) .. ?  
O23C W8C O57C 83.5(6) .. ?  
O28C W8C O57C 84.0(6) .. ?  
O29C W8C O57C 73.2(6) .. ?  
O41C W8C O57C 79.5(6) .. ?  
O36C W9C O24C 100.2(7) .. ?  
O36C W9C O30C 101.8(7) .. ?  
O24C W9C O30C 90.4(7) .. ?  
O36C W9C O29C 100.3(7) .. ?  
O24C W9C O29C 91.9(7) .. ?  
O30C W9C O29C 157.0(6) .. ?  
O36C W9C O42C 97.3(8) .. ?  
O24C W9C O42C 162.3(7) .. ?  
O30C W9C O42C 83.7(7) .. ?  
O29C W9C O42C 87.3(7) .. ?  
O36C W9C O57C 173.2(6) .. ?  
O24C W9C O57C 82.6(6) .. ?  
O30C W9C O57C 84.2(6) .. ?  
O29C W9C O57C 73.3(6) .. ?  
O42C W9C O57C 80.3(6) .. ?  
O37C W10C O25C 99.9(8) .. ?  
O37C W10C O30C 102.5(7) .. ?  
O25C W10C O30C 91.3(6) .. ?

O37C W10C O43C 97.1(8) . . ?  
O25C W10C O43C 163.1(7) . . ?  
O30C W10C O43C 84.7(7) . . ?  
O37C W10C O31C 100.0(7) . . ?  
O25C W10C O31C 91.5(7) . . ?  
O30C W10C O31C 156.5(7) . . ?  
O43C W10C O31C 85.9(7) . . ?  
O37C W10C O58C 172.3(7) . . ?  
O25C W10C O58C 82.6(6) . . ?  
O30C W10C O58C 84.7(6) . . ?  
O43C W10C O58C 80.6(6) . . ?  
O31C W10C O58C 72.5(6) . . ?  
O37C W10C K1 38.2(6) . 2\_566 ?  
O25C W10C K1 62.7(5) . 2\_566 ?  
O30C W10C K1 94.0(5) . 2\_566 ?  
O43C W10C K1 133.9(5) . 2\_566 ?  
O31C W10C K1 107.9(5) . 2\_566 ?  
O58C W10C K1 145.3(4) . 2\_566 ?  
O38C W11C O26C 99.9(7) . . ?  
O38C W11C O32C 103.5(7) . . ?  
O26C W11C O32C 91.0(7) . . ?  
O38C W11C O31C 99.2(7) . . ?  
O26C W11C O31C 92.7(7) . . ?  
O32C W11C O31C 156.0(6) . . ?  
O38C W11C O44C 97.5(7) . . ?  
O26C W11C O44C 162.5(6) . . ?  
O32C W11C O44C 83.4(7) . . ?  
O31C W11C O44C 86.1(7) . . ?  
O38C W11C O58C 172.3(6) . . ?  
O26C W11C O58C 82.8(6) . . ?  
O32C W11C O58C 83.6(6) . . ?  
O31C W11C O58C 73.4(6) . . ?  
O44C W11C O58C 80.1(6) . . ?  
O39C W12C O27C 98.8(8) . . ?  
O39C W12C O32C 103.5(7) . . ?  
O27C W12C O32C 91.6(7) . . ?  
O39C W12C O33C 99.1(7) . . ?  
O27C W12C O33C 92.6(7) . . ?  
O32C W12C O33C 156.1(7) . . ?  
O39C W12C O45C 98.1(8) . . ?  
O27C W12C O45C 163.1(7) . . ?  
O32C W12C O45C 83.7(7) . . ?  
O33C W12C O45C 85.5(7) . . ?  
O39C W12C O56C 172.0(7) . . ?  
O27C W12C O56C 83.3(6) . . ?  
O32C W12C O56C 84.2(6) . . ?  
O33C W12C O56C 73.0(6) . . ?

O45C W12C O56C 80.1(6) . . ?  
O39C W12C K2 36.2(6) . . ?  
O27C W12C K2 63.5(5) . . ?  
O32C W12C K2 95.6(5) . . ?  
O33C W12C K2 107.3(5) . . ?  
O45C W12C K2 133.0(5) . . ?  
O56C W12C K2 146.8(4) . . ?  
O46C W13C O41C 103.4(9) . . ?  
O46C W13C O40C 103.2(9) . . ?  
O41C W13C O40C 87.6(7) . . ?  
O46C W13C O51C 100.0(9) . . ?  
O41C W13C O51C 156.6(7) . . ?  
O40C W13C O51C 87.7(7) . . ?  
O46C W13C O47C 99.3(9) . . ?  
O41C W13C O47C 88.8(7) . . ?  
O40C W13C O47C 157.4(7) . . ?  
O51C W13C O47C 86.8(7) . . ?  
O46C W13C O59C 169.3(8) . . ?  
O41C W13C O59C 84.4(6) . . ?  
O40C W13C O59C 84.3(6) . . ?  
O51C W13C O59C 72.3(6) . . ?  
O47C W13C O59C 73.2(6) . . ?  
O48C W14C O42C 103.2(8) . . ?  
O48C W14C O43C 102.2(8) . . ?  
O42C W14C O43C 87.0(7) . . ?  
O48C W14C O47C 101.0(8) . . ?  
O42C W14C O47C 88.1(7) . . ?  
O43C W14C O47C 156.8(7) . . ?  
O48C W14C O49C 100.5(8) . . ?  
O42C W14C O49C 156.3(7) . . ?  
O43C W14C O49C 88.4(7) . . ?  
O47C W14C O49C 87.0(7) . . ?  
O48C W14C O59C 171.0(7) . . ?  
O42C W14C O59C 83.7(6) . . ?  
O43C W14C O59C 83.8(6) . . ?  
O47C W14C O59C 73.1(6) . . ?  
O49C W14C O59C 72.7(6) . . ?  
O50C W15C O45C 102.7(8) . . ?  
O50C W15C O44C 103.6(8) . . ?  
O45C W15C O44C 88.1(7) . . ?  
O50C W15C O49C 99.8(8) . . ?  
O45C W15C O49C 157.5(7) . . ?  
O44C W15C O49C 88.1(7) . . ?  
O50C W15C O51C 100.6(8) . . ?  
O45C W15C O51C 87.9(7) . . ?  
O44C W15C O51C 155.7(7) . . ?  
O49C W15C O51C 86.5(7) . . ?



O50C W15C O59C 169.6(8) . . ?  
O45C W15C O59C 84.6(6) . . ?  
O44C W15C O59C 83.8(6) . . ?  
O49C W15C O59C 72.9(6) . . ?  
O51C W15C O59C 72.0(6) . . ?  
O16D W1D O4D 100.1(7) . . ?  
O16D W1D O15D 98.8(7) . . ?  
O4D W1D O15D 92.7(7) . . ?  
O16D W1D O10D 102.5(7) . . ?  
O4D W1D O10D 88.1(7) . . ?  
O15D W1D O10D 158.2(6) . . ?  
O16D W1D O22D 96.5(7) . . ?  
O4D W1D O22D 163.1(7) . . ?  
O15D W1D O22D 87.6(7) . . ?  
O10D W1D O22D 85.4(6) . . ?  
O16D W1D O53D 172.0(6) . . ?  
O4D W1D O53D 82.1(6) . . ?  
O15D W1D O53D 73.3(6) . . ?  
O10D W1D O53D 85.2(5) . . ?  
O22D W1D O53D 81.8(6) . . ?  
O16D W1D Na45 53.2(7) . . ?  
O4D W1D Na45 49.7(6) . . ?  
O15D W1D Na45 85.0(6) . . ?  
O10D W1D Na45 111.6(6) . . ?  
O22D W1D Na45 147.0(6) . . ?  
O53D W1D Na45 126.1(5) . . ?  
O17D W2D O5D 100.6(7) . . ?  
O17D W2D O10D 101.9(7) . . ?  
O5D W2D O10D 88.6(7) . . ?  
O17D W2D O11D 100.0(7) . . ?  
O5D W2D O11D 92.9(7) . . ?  
O10D W2D O11D 157.4(6) . . ?  
O17D W2D O23D 95.9(7) . . ?  
O5D W2D O23D 163.3(6) . . ?  
O10D W2D O23D 85.7(6) . . ?  
O11D W2D O23D 86.6(6) . . ?  
O17D W2D O54D 172.8(7) . . ?  
O5D W2D O54D 81.8(6) . . ?  
O10D W2D O54D 84.9(5) . . ?  
O11D W2D O54D 73.0(5) . . ?  
O23D W2D O54D 82.1(5) . . ?  
O18D W3D O6D 100.5(7) . . ?  
O18D W3D O11D 99.2(7) . . ?  
O6D W3D O11D 91.9(6) . . ?  
O18D W3D O12D 103.1(7) . . ?  
O6D W3D O12D 89.6(6) . . ?  
O11D W3D O12D 157.0(6) . . ?

O18D W3D O24D 95.7(7) . . ?  
O6D W3D O24D 163.7(7) . . ?  
O11D W3D O24D 87.2(6) . . ?  
O12D W3D O24D 85.0(6) . . ?  
O18D W3D O54D 172.1(6) . . ?  
O6D W3D O54D 81.2(6) . . ?  
O11D W3D O54D 73.0(5) . . ?  
O12D W3D O54D 84.5(6) . . ?  
O24D W3D O54D 83.0(6) . . ?  
O19D W4D O7D 101.4(7) . . ?  
O19D W4D O12D 102.1(7) . . ?  
O7D W4D O12D 90.6(6) . . ?  
O19D W4D O13D 99.2(7) . . ?  
O7D W4D O13D 93.8(6) . . ?  
O12D W4D O13D 156.9(6) . . ?  
O19D W4D O25D 95.5(7) . . ?  
O7D W4D O25D 163.0(7) . . ?  
O12D W4D O25D 83.4(6) . . ?  
O13D W4D O25D 85.9(6) . . ?  
O19D W4D O55D 171.8(6) . . ?  
O7D W4D O55D 81.4(6) . . ?  
O12D W4D O55D 85.5(6) . . ?  
O13D W4D O55D 72.8(5) . . ?  
O25D W4D O55D 82.3(6) . . ?  
O20D W5D O8D 100.4(7) . . ?  
O20D W5D O14D 103.6(7) . . ?  
O8D W5D O14D 88.5(6) . . ?  
O20D W5D O13D 99.4(7) . . ?  
O8D W5D O13D 93.5(6) . . ?  
O14D W5D O13D 156.2(6) . . ?  
O20D W5D O26D 95.8(7) . . ?  
O8D W5D O26D 163.7(6) . . ?  
O14D W5D O26D 86.0(6) . . ?  
O13D W5D O26D 85.5(6) . . ?  
O20D W5D O55D 172.1(7) . . ?  
O8D W5D O55D 81.8(5) . . ?  
O14D W5D O55D 84.0(6) . . ?  
O13D W5D O55D 72.8(5) . . ?  
O26D W5D O55D 82.4(5) . . ?  
O20D W5D Na5 48.9(7) . . ?  
O8D W5D Na5 53.1(6) . . ?  
O14D W5D Na5 110.0(6) . . ?  
O13D W5D Na5 89.8(6) . . ?  
O26D W5D Na5 143.1(6) . . ?  
O55D W5D Na5 130.9(5) . . ?  
O21D W6D O9D 99.8(7) . . ?  
O21D W6D O14D 103.1(7) . . ?

O9D W6D O14D 89.4(6) . . ?  
O21D W6D O15D 99.2(7) . . ?  
O9D W6D O15D 93.2(6) . . ?  
O14D W6D O15D 156.8(7) . . ?  
O21D W6D O27D 96.3(7) . . ?  
O9D W6D O27D 163.8(6) . . ?  
O14D W6D O27D 84.9(6) . . ?  
O15D W6D O27D 86.3(6) . . ?  
O21D W6D O53D 172.1(6) . . ?  
O9D W6D O53D 82.7(6) . . ?  
O14D W6D O53D 84.4(6) . . ?  
O15D W6D O53D 73.1(6) . . ?  
O27D W6D O53D 81.6(6) . . ?  
O34D W7D O22D 99.8(8) . . ?  
O34D W7D O28D 101.8(7) . . ?  
O22D W7D O28D 90.2(7) . . ?  
O34D W7D O33D 98.9(8) . . ?  
O22D W7D O33D 90.2(7) . . ?  
O28D W7D O33D 158.9(7) . . ?  
O34D W7D O40D 98.1(8) . . ?  
O22D W7D O40D 162.0(7) . . ?  
O28D W7D O40D 85.5(7) . . ?  
O33D W7D O40D 87.6(7) . . ?  
O34D W7D O56D 172.3(7) . . ?  
O22D W7D O56D 81.8(6) . . ?  
O28D W7D O56D 85.7(6) . . ?  
O33D W7D O56D 73.5(7) . . ?  
O40D W7D O56D 80.5(6) . . ?  
O35D W8D O23D 100.7(7) . . ?  
O35D W8D O28D 101.3(7) . . ?  
O23D W8D O28D 90.2(7) . . ?  
O35D W8D O29D 100.4(8) . . ?  
O23D W8D O29D 91.6(7) . . ?  
O28D W8D O29D 157.5(7) . . ?  
O35D W8D O41D 96.7(7) . . ?  
O23D W8D O41D 162.5(6) . . ?  
O28D W8D O41D 84.7(7) . . ?  
O29D W8D O41D 87.0(7) . . ?  
O35D W8D O57D 173.0(7) . . ?  
O23D W8D O57D 81.8(6) . . ?  
O28D W8D O57D 85.1(6) . . ?  
O29D W8D O57D 73.0(6) . . ?  
O41D W8D O57D 81.1(6) . . ?  
O36D W9D O24D 99.9(8) . . ?  
O36D W9D O30D 101.4(8) . . ?  
O24D W9D O30D 89.6(7) . . ?  
O36D W9D O29D 99.5(8) . . ?

O24D W9D O29D 90.3(7) . . ?  
O30D W9D O29D 158.8(7) . . ?  
O36D W9D O42D 96.7(8) . . ?  
O24D W9D O42D 163.4(7) . . ?  
O30D W9D O42D 86.3(7) . . ?  
O29D W9D O42D 87.7(7) . . ?  
O36D W9D O57D 172.3(7) . . ?  
O24D W9D O57D 82.0(6) . . ?  
O30D W9D O57D 86.0(6) . . ?  
O29D W9D O57D 73.0(6) . . ?  
O42D W9D O57D 81.6(6) . . ?  
O37D W10D O25D 101.3(8) . . ?  
O37D W10D O30D 100.9(7) . . ?  
O25D W10D O30D 89.5(7) . . ?  
O37D W10D O31D 100.5(7) . . ?  
O25D W10D O31D 92.5(7) . . ?  
O30D W10D O31D 157.7(7) . . ?  
O37D W10D O43D 95.8(8) . . ?  
O25D W10D O43D 162.7(7) . . ?  
O30D W10D O43D 84.6(7) . . ?  
O31D W10D O43D 87.0(7) . . ?  
O37D W10D O58D 172.9(7) . . ?  
O25D W10D O58D 82.0(6) . . ?  
O30D W10D O58D 85.3(6) . . ?  
O31D W10D O58D 73.0(6) . . ?  
O43D W10D O58D 81.3(6) . . ?  
O38D W11D O26D 100.0(7) . . ?  
O38D W11D O32D 103.0(8) . . ?  
O26D W11D O32D 89.8(7) . . ?  
O38D W11D O31D 97.9(7) . . ?  
O26D W11D O31D 91.8(7) . . ?  
O32D W11D O31D 158.4(7) . . ?  
O38D W11D O44D 96.8(8) . . ?  
O26D W11D O44D 163.2(7) . . ?  
O32D W11D O44D 86.4(7) . . ?  
O31D W11D O44D 85.9(7) . . ?  
O38D W11D O58D 171.3(7) . . ?  
O26D W11D O58D 82.8(6) . . ?  
O32D W11D O58D 85.2(6) . . ?  
O31D W11D O58D 73.6(6) . . ?  
O44D W11D O58D 80.5(6) . . ?  
O38D W11D K3 51.0(6) . 2\_567 ?  
O26D W11D K3 98.4(5) . 2\_567 ?  
O32D W11D K3 153.6(5) . 2\_567 ?  
O31D W11D K3 46.9(5) . 2\_567 ?  
O44D W11D K3 92.1(5) . 2\_567 ?  
O58D W11D K3 120.6(4) . 2\_567 ?

O39D W12D O27D 99.8(8) . . ?  
O39D W12D O32D 102.0(8) . . ?  
O27D W12D O32D 90.0(7) . . ?  
O39D W12D O33D 99.3(9) . . ?  
O27D W12D O33D 91.4(7) . . ?  
O32D W12D O33D 158.2(7) . . ?  
O39D W12D O45D 96.8(8) . . ?  
O27D W12D O45D 163.3(7) . . ?  
O32D W12D O45D 84.5(7) . . ?  
O33D W12D O45D 87.9(7) . . ?  
O39D W12D O56D 172.5(8) . . ?  
O27D W12D O56D 83.1(6) . . ?  
O32D W12D O56D 84.9(6) . . ?  
O33D W12D O56D 73.7(7) . . ?  
O45D W12D O56D 80.7(6) . . ?  
O46D W13D O41D 102.4(8) . . ?  
O46D W13D O40D 104.9(8) . . ?  
O41D W13D O40D 88.3(7) . . ?  
O46D W13D O47D 97.7(8) . . ?  
O41D W13D O47D 89.3(7) . . ?  
O40D W13D O47D 157.2(7) . . ?  
O46D W13D O51D 99.2(8) . . ?  
O41D W13D O51D 158.5(7) . . ?  
O40D W13D O51D 87.1(7) . . ?  
O47D W13D O51D 86.9(7) . . ?  
O46D W13D O59D 168.3(7) . . ?  
O41D W13D O59D 85.0(6) . . ?  
O40D W13D O59D 84.1(6) . . ?  
O47D W13D O59D 73.0(6) . . ?  
O51D W13D O59D 73.6(6) . . ?  
O48D W14D O42D 102.3(8) . . ?  
O48D W14D O43D 102.5(8) . . ?  
O42D W14D O43D 88.2(7) . . ?  
O48D W14D O49D 101.2(8) . . ?  
O42D W14D O49D 156.4(8) . . ?  
O43D W14D O49D 89.4(7) . . ?  
O48D W14D O47D 99.9(8) . . ?  
O42D W14D O47D 86.8(7) . . ?  
O43D W14D O47D 157.5(7) . . ?  
O49D W14D O47D 86.5(7) . . ?  
O48D W14D O59D 170.5(7) . . ?  
O42D W14D O59D 83.5(6) . . ?  
O43D W14D O59D 85.1(6) . . ?  
O49D W14D O59D 72.9(7) . . ?  
O47D W14D O59D 72.6(6) . . ?  
O50D W15D O45D 102.9(9) . . ?  
O50D W15D O44D 104.7(8) . . ?

O45D W15D O44D 88.0(8) . . ?  
O50D W15D O51D 98.1(9) . . ?  
O45D W15D O51D 89.0(8) . . ?  
O44D W15D O51D 157.1(7) . . ?  
O50D W15D O49D 99.5(9) . . ?  
O45D W15D O49D 157.6(7) . . ?  
O44D W15D O49D 87.4(8) . . ?  
O51D W15D O49D 86.8(8) . . ?  
O50D W15D O59D 168.5(8) . . ?  
O45D W15D O59D 85.1(6) . . ?  
O44D W15D O59D 83.7(6) . . ?  
O51D W15D O59D 73.5(6) . . ?  
O49D W15D O59D 72.6(6) . . ?
